# 1 **The drivers of dark diversity in the Scandinavian tundra are metric-dependent**

2 *Hostens Lore*<sup>1</sup>, *Van Meerbeek Koenraad*<sup>2,3</sup>, *Wiegmans Dymphna*<sup>1</sup>, *Larson Keith*<sup>4</sup>, *Lenoir Jonathan*<sup>5</sup>,  
3 *Clavel Jan*<sup>1</sup>, *Wedegärtner Ronja*<sup>6</sup>, *Pirée Amber*<sup>1</sup>, *Nijs Ivan*<sup>1</sup>, *Lembrechts J. Jonas*<sup>1</sup>

## 4 **Affiliations**

5 <sup>1</sup>Research Group Plants and Ecosystems (PLECO), University of Antwerp, Belgium

6 <sup>2</sup>Department Earth of Environmental Science, KU Leuven, Leuven, Belgium

7 <sup>3</sup>KU Leuven Plant Institute, KU Leuven, Leuven, Belgium

8 <sup>4</sup>Climate Impacts Research Centre, Department of Ecology and Environmental Sciences, Umeå  
9 University, Sweden

10 <sup>5</sup>UMR CNRS 7058, Ecologie et Dynamique des Systèmes Anthropisés (EDYSAN), Université de Picardie  
11 Jules Verne, Amiens, France

12 <sup>6</sup>Department of Biology, Norwegian University of Science and Technology, Trondheim, Norway

## 13 **Correspondence**

14 Lore Hostens, Research Group Plants and Ecosystems (PLECO), University of Antwerp, Belgium

15 Email: [lore.hostens@kuleuven.be](mailto:lore.hostens@kuleuven.be)

16 Orcid: <https://orcid.org/0000-0001-8245-1152>

17 Jonas J. Lembrechts, Research Center Plants and Ecosystems (PLECO), University of Antwerp, Belgium

18 Email: [jonas.lembrechts@uantwerpen.be](mailto:jonas.lembrechts@uantwerpen.be)

19 Orcid: <https://orcid.org/0000-0002-1933-0750>

## 20 **Funding information**

21 This project was funded by FWO projects G018919N, 12P1819N and W001919N, as well as by ANR-20-  
22 EB15-0004, BiodivERsA, BiodivClim call 2019–2020.

## 23 **Abstract**

24 **Aim:** Dark diversity refers to the set of species that are not observed in an area but could potentially  
25 occur based on suitable local environmental conditions. In this paper, we applied both niche-based  
26 and co-occurrence-based methods to estimate the dark diversity of vascular plant species in the  
27 subarctic tundra. We then aimed to unravel the drivers explaining (1) why some locations were missing  
28 relatively more suitable species than others, and (2) why certain plant species were more often absent  
29 from suitable locations than others.

30 **Location:** The Scandinavian tundra around Abisko, northern Sweden.

31 **Methods:** We calculated the dark diversity in 107 plots spread out across four mountain trails using  
32 four different methods. Two niche-based (Beals' index and hypergeometric method) and two co-  
33 occurrences-based (climatic niche model and climatic niche model followed by species-specific  
34 threshold) methods. This was then followed by multiple generalized linear mixed models and general  
35 linear models to determine which habitat characteristics and species traits contributed most to the  
36 dark diversity.

37 **Results:** The study showed a notable divergence in the predicted drivers of dark diversity depending  
38 on the method used. Nevertheless, we can conclude that plot-level dark diversity was generally 18%  
39 higher in areas at low elevations and 30% and 10% higher in areas with a low species richness or low  
40 levels of habitat disturbance, respectively.

41 **Conclusion:** Our findings call for caution when interpreting statistical findings of dark diversity  
42 estimates. Even so, all analyses point towards an important role for natural processes such as

43 competitive dominance as main driver of the spatial patterns found in dark diversity in the northern  
44 Scandes.

45 **Key-words:** plant ecology, Beals' index, co-occurrence-model, niche-model, method comparison, plant  
46 diversity, regional species pool, plant traits, habitat characteristics

## 47 **Introduction**

48 Terrestrial ecosystems are increasingly affected by land-use and climate change, leading to large-scale  
49 biodiversity loss and community turnover (Theurillat & Guisan, 2001; Mooney et al., 2009; Newbold et  
50 al., 2015). Biodiversity plays an important role in ecosystem health and its loss alters ecosystem  
51 function (Hooper et al., 2012; Tilman et al., 2014). While most research has focused on the set of  
52 species that occur in an area, much less attention has gone to those species that are missing but could  
53 potentially inhabit the area (Pärtel et al., 2011). Nevertheless, to get a better understanding of  
54 community patterns and their underlying processes, such species absences hold viable additional  
55 information (Pärtel, 2014). Knowing which species from the regional species pool are absent within a  
56 given locality and identifying why, can help fine-tune conservation planning (Lewis et al., 2017). For  
57 example, if many of the absent – yet expected based on climate conditions – species are dispersal  
58 limited or cannot access the focal area due to strong dispersal barriers (i.e., habitat fragmentation),  
59 then some form of facilitated dispersal through assisted migration or actions to restore habitat  
60 connectivity is needed to restore biodiversity. However, if the nutrient conditions in the soil of the  
61 focal area are unsuitable for many of the missing species, then only providing assisted migration  
62 towards climatically suitable locations or restoring suitable climatic corridors would not be sufficient  
63 as restoration measures.

64 Species belonging to the missing part of the environmentally filtered regional species pool are defined  
65 as the so-called “dark diversity” (see Figure 1a), a term introduced by Pärtel et al. (2011). To be part of  
66 the dark diversity, the absent species must have a reasonable probability of dispersing to the area (i.e.,  
67 by belonging to the regional species pool) and its ecological requirements (depending on the  
68 methodology either only its climatic or all environmental requirements) must match the local  
69 conditions (Pärtel, 2014). As a result, species that are present in the regional surroundings of the focal  
70 locality can be locally missing because they have a lower competitive ability, are dispersal limited, are  
71 ill-adapted to abiotic conditions, or due to stochastic processes (Riibak et al., 2015). Understanding  
72 how extrinsic abiotic conditions and intrinsic species characteristics related to competition and  
73 dispersal abilities influence a species' absence can consequently give a better view of the community  
74 assembly (Belinchón et al., 2020).

75 The dark diversity concept does not encompass the total regional species pool across different habitats  
76 but focuses on the environmentally filtered, or habitat-specific, regional species pool (Lewis et al.,  
77 2017). Combining this habitat-specific regional species pool with the local observed species  
78 composition can result in an estimate of the dark diversity (Figure 1). However, there are several  
79 methods that use different biotic and abiotic filters to estimate the habitat-specific species pool (Figure  
80 1). Depending on the method, different outcomes will be obtained, as explained below. One of the  
81 main benefits of the dark diversity concept is that it allows us to compare the status of biodiversity in  
82 different habitats or ecosystems even if the local diversity differs by multiple orders of magnitude  
83 (Pärtel et al., 2011).

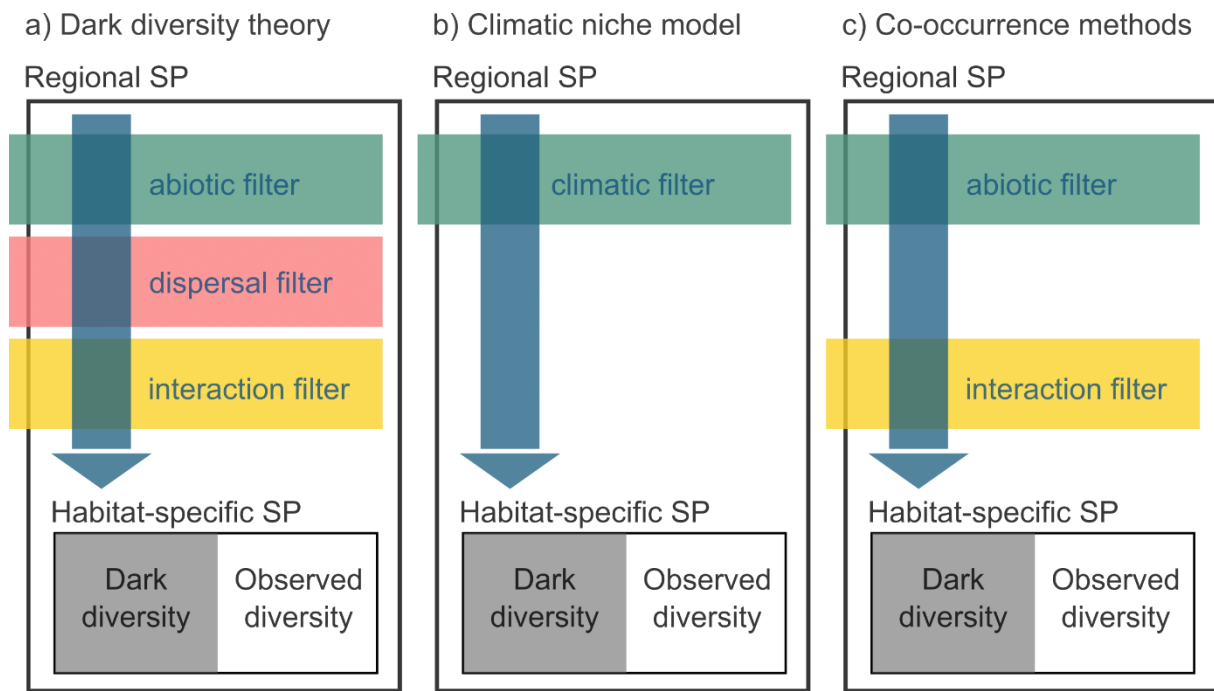

84

85 *Figure 1: Schematic overview of three approaches to estimate the habitat specific species pool (SP). A) the theoretical concept*  
86 *of dark diversity, where the dark diversity is the non-observed set of species in a certain location, after filtering the regional*  
87 *species pool based on abiotic, dispersal and biotic interaction limitations. In b), dark diversity is calculated using climatic*  
88 *filtering of the regional species pool (e.g. using climatic niche models to estimate which species could occur at a certain*  
89 *location), while c) represents the commonly used co-occurrence based method, which integrates both abiotic and interaction*  
90 *filters. Figure adjusted from Stephenson (2016). The combination of dark- and observed diversity encompasses the habitat-*  
91 *specific species pool.*

92 From a conservation perspective, the fact that species can be part of a community does not always  
93 mean that they should be, since not all species are desirable (Lewis et al., 2017). By only looking at  
94 suitable environmental conditions, non-native species adapted to those conditions will, for example,  
95 also be included. Very often, however, established non-native species have become part of the habitat-  
96 specific regional species pool and can, as a result, also be part of the dark diversity in the focal site.  
97 Dark diversity can therefore not only be used to investigate unwanted absences and ways to mitigate  
98 them, but also to prevent unwanted presences when non-native species are considered part of the  
99 habitat-specific regional species pool (Lewis et al., 2017). Monitoring both the dark and observed  
100 diversity can then give an early warning signal when non-native species are part of the dark diversity  
101 of a location, i.e., even before they are entering the observed diversity. Additionally, the approach can  
102 also inform us when species are leaving the dark and entering the observed diversity in response to,  
103 for instance, restoration actions (Lewis et al., 2017).

104 Estimating dark diversity is not straightforward but can be done in multiple ways (Lewis et al., 2016,  
105 Figure 1). The difficulty lies in estimating the habitat-specific species pool, which is, as explained above,  
106 the set of species in a region that can persist in the environmental conditions of the target site (Pärtel  
107 et al., 2011). It encompasses both the observed and dark diversity of a habitat. One could perform  
108 extensive sampling of habitat types in a region to estimate the habitat-specific species pool of each  
109 habitat type but this can be costly and time-consuming (de Bello et al., 2016). Therefore,  
110 computational approaches are often implemented. Most commonly, two types of methods are used  
111 to estimate the habitat-specific species pool, either (1) based on the abiotic niche of the species (e.g.,  
112 using ecological indicator values or species distribution models) or (2) based on metrics of species' co-  
113 occurrence with other species in the region (e.g., the Beals' probability index or the hypergeometric  
114 method) (Lenoir et al., 2010; de Bello et al., 2016; Carmona and Pärtel, 2020).

115 Ecological indicator values are often used as an estimate for a species' ecological requirements. The  
116 approach allows to identify species from the regional species pool along environmental gradients  
117 based on their ecological preferences (Ellenberg et al., 1991). A downside of this method is the  
118 difficulty of defining the realized niche of species since such indicator values are rough estimates of  
119 the niche optimum along a few specific ecological gradients, often based on expert knowledge (Lewis  
120 et al., 2016). Potentially more accurate approaches based on abiotic conditions make use of habitat  
121 suitability models to estimate species' environmental niches (Guisan & Thuiller, 2005). These models  
122 can be used to determine the environmental conditions suitable for a species (Parolo et al., 2008). In  
123 this method, the accuracy of the models highly depends on the resolution as well as on the selected  
124 set of environmental data (de Bello et al., 2016).

125 In both the above-mentioned methods, the aim is to estimate the suitability of a location based only  
126 on the environmental niche of the species, regardless of the other species co-occurring in said location.  
127 By contrast, one could also estimate the potential of finding a species at a certain location based on  
128 the presence of its associated species. The Beals' probability index can be used to calculate species co-  
129 occurrence patterns (Beals, 1984). It uses the idea that the presence of a species that is frequently  
130 found together with another species could indicate shared suitable abiotic conditions (Ewald, 2002). If  
131 the associated species of a target species are observed, but the target species itself is not, it is part of  
132 the dark diversity. The hypergeometric method works similarly by verifying if certain species  
133 associations occur more often than predicted by chance and by estimating the dark diversity of a given  
134 species at a location from the likelihood of its co-occurrence with species present at that location  
135 (Carmona & Pärtel, 2020). The advantage of these approaches is that one only requires species  
136 observations and no environmental conditions. However, the prediction of the probability of a given  
137 species to belong to the dark diversity is dependent on the distribution of other species, which is  
138 especially challenging for species that are not strongly confined to particular communities or for  
139 environments where traditional communities and thus species associations are truncated (e.g., due to  
140 habitat disturbances).

141 All these approaches have in common that they help identify species that are part of the habitat-  
142 specific species pool but that are not recorded in the observed diversity at a certain location, making  
143 them part of the dark diversity (Figure 1; Pärtel et al., 2011). In this paper, we applied both niche- and  
144 co-occurrence-based methods to estimate dark diversity in a case study on the subarctic tundra around  
145 Abisko, northern Sweden. We then further explored the drivers behind the spatial patterns of this dark  
146 diversity. The concept of dark diversity is still in its infancy and therefore only a handful of studies have  
147 explored why species are part of the dark diversity, none of which were to our knowledge conducted  
148 in a tundra climate (Belinchón et al., 2020; Moeslund et al., 2017; Riibak et al., 2015). In this study, we  
149 wanted to unravel the drivers behind (1) why some locations are missing relatively more suitable  
150 species than others, and (2) why certain vascular plants of the Scandinavian tundra are more often  
151 absent from suitable locations than others.

152 In light of the first research question, we expected locations with a higher relative dark diversity,  
153 hereafter referred to as plot-level dark diversity (i.e., a higher percentage of missing species from the  
154 habitat-specific species pool) to: (1) appear at lower elevations, as more intense competition will  
155 exclude a higher proportion of species (Jones & Gilbert, 2016); (2) be at the extreme ends of  
156 disturbance gradients, based on the intermediate disturbance hypothesis (Lembrechts et al., 2014;  
157 Rashid et al., 2021); (3) be at the extreme end of low pH and/or moisture gradients, since such  
158 conditions can be tolerated by a few species only (Gough et al., 2000; Vonlanthen et al., 2006); or (4)  
159 have low observed species richness, as these locations will be dominated by highly competitive species  
160 preventing specialist species from co-occurring (Pellissier et al., 2010). Of course, these factors would

161 act in addition to the stochasticity that always explains part of the variation in species occurrences at  
162 small spatial scales (Mohd et al., 2016).

163 Secondly, we predict that plant species with a higher dark diversity probability, hereafter referred to  
164 as species-level dark diversity (i.e., absent in a higher percentage of plots where they were predicted  
165 to occur) to: (1) have a higher specific leaf area (SLA), since the Scandinavian tundra is a nutrient-poor  
166 environment (Westoby, 1998); (2) have a lower maximum vegetative plant height, as smaller plants  
167 would be more easily outcompeted in plots where they could theoretically occur; (3) have a higher seed  
168 mass or short-distance dispersal, since these are (loosely) correlated to a limited dispersal ability and  
169 lower seed abundance, which decreases the number of successful dispersal events (Howe &  
170 Smallwood, 1982; Ozinga et al., 2005); (4) be more recently introduced in the region, as non-native  
171 species have a more limited distribution and show possible time-lags in niche filling (Alexander et al.,  
172 2016; Crooks, 2005); or finally, (5) be associated with arbuscular mycorrhizal (AM) or ectomycorrhizal  
173 (EcM) fungi, as the native vegetation in the region is dominated by ericoid mycorrhizal (ErM) species  
174 (Clavel, 2022 unpubl.; Finlay, 2008; Tedersoo, 2017).

## 175 **2 Materials and methods**

### 176 **2.1 Study area**

177 The field data collection was performed in July and August 2021 in the Abisko area, northern Sweden  
178 (68°21'N, 18°49'E). The region has a subarctic montane climate with an average annual temperature  
179 of -0.6°C (1913-2020, although average annual temperatures have not dropped below 0°C since 2011)  
180 and average annual precipitation of 310 mm (Abisko Scientific Research Station, 400 m above sea level  
181 (a.s.l.); <https://polar.se/>). The soil is comprised of till, colluvium, and glacio-fluvial deposits (Callaghan  
182 et al., 2013). At high elevations, the area is covered in snow for about 27 weeks of the year (Callaghan  
183 et al., 2013). At low elevations, the vegetation is dominated by open birch forests (*Betula pubescens*  
184 Ehrh.), with additional presence of rowan (*Sorbus aucuparia* L.) and several willow species (*Salix* sp.).  
185 The understory vegetation often consists of heath species (e.g., dwarf birch (*Betula nana* L.), European  
186 blueberry (*Vaccinium myrtillus* L.) and black crowberry (*Empetrum nigrum* L.)), or meadow species  
187 (e.g., Alpine bistort (*Bistorta vivipara* L.), globeflower (*Trollius europaeus* L.) and Alpine saw-wort  
188 (*Saussurea alpina* DC.)) (Sonesson & Lundberg, 1974). Above the treeline (520 m a.s.l.), the vegetation  
189 is dominated by alpine/arctic heathland species (e.g., blue heath (*Phyllodoce caerulea* L.), bog  
190 blueberry (*Vaccinium uliginosum* L.) and lingonberry (*Vaccinium vitis-ideae* L.)) (Kullman, 2015).

### 191 **2.2 Field data collection**

#### 192 **2.2.1 Study sites**

193 A total of 107 plots were surveyed in the vicinity of four mountain trails: Björkliden, Låktatjåkka, Nuolja,  
194 and Rallarvägen (Figure 2).

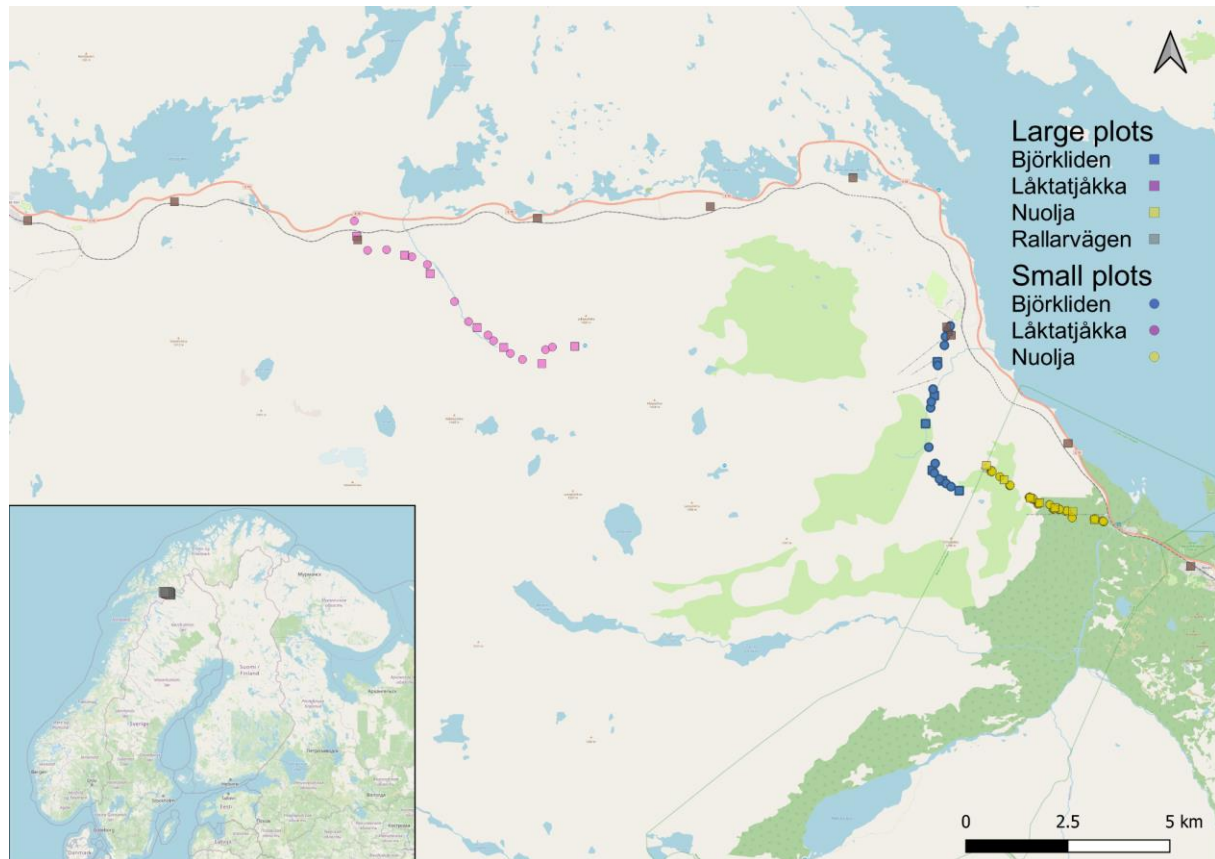

195

196 *Figure 2: Map of the study area around Abisko, Sweden (grey dot on the inset), with 107 surveyed plots*  
197 *along the four hiking trails (colors) and the different survey methods (symbols).*

198 Data from new and ongoing vegetation surveys were combined, with two different methodologies: 73  
199 1 × 1 m<sup>2</sup> plots from a long-term vegetation composition monitoring project in the area (hereafter called  
200 'small plots'), as well as 34 large (10 × 10 m<sup>2</sup>) plots established in the framework of the global  
201 DarkDivNet network (Pärtel et al., 2019). Of the 107 plots, two times 20 were located along trails close  
202 to Björkliden and around Låktatjåkka (Wedegärtner et al., 2022), 57 in the Abisko National Park on  
203 Mount Nuolja (MacDougall et al., 2021), and 10 along the Rallarvägen.

## 204 2.2.2 Large plots

205 The vegetation monitoring method used in the large plots was based on the DarkDivNet protocol  
206 (Pärtel et al., 2019). The plots (10 × 10 m<sup>2</sup>) were placed at a 10 m perpendicular distance from the trail.  
207 In each plot, all vascular plants were recorded. Species were identified using the Fjällflora (Mossberg  
208 & Stenberg 2008). Observations that could not be identified to the species level (e.g., *Alchemilla* sp.)  
209 were removed from the species list and thus also from the regional species pool. Furthermore,  
210 following the DarkDivNet protocol, the maximum vegetative height (cm) was measured with a ruler  
211 for the tallest individual of each species in all plots.

212 In every plot, we visually estimated the cover (%) of total vegetation, bare ground, rock, litter,  
213 herbaceous vegetation, bryophytes, lichen, shrubs, and trees (> 200 cm). At the center of every plot,  
214 the exact location was recorded with a hand-held GPS receiver. Soil samples were collected using the  
215 protocol explained below (see 2.3).

216

217

### 218 **2.2.3 Small plots**

219 The small plots were surveyed using the pin-point or point intercept method, which is often used to  
220 assess plant cover (Jonasson, 1988). A  $1 \times 1 \text{ m}^2$  plot was placed at 10 m from the trail. In one plot, 100  
221 pins were vertically dropped in 10-cm increments from left to right and top to bottom. With every pin-  
222 drop, we recorded the vascular plant species touching the pin, multiple recordings for the same species  
223 occurred when more than one individual of that species touched the pin. When the pin touched only  
224 the ground, the observation was categorized as either litter, bryophytes, bare soil, or lichen, a single  
225 hit was noted. Soil samples were collected using the same protocol as explained below (see 2.3).

### 226 **2.3 Soil sample analysis**

227 Soil samples were collected in 50 out of the 107 plots (both large and small plots). During sampling,  
228 the litter covering the soil was removed and a minimum of 300 g of soil was taken from the top 10 cm  
229 of the ground. Soil samples could not be collected along the Nuolja trail (57/107 plots) as this trail is in  
230 the Abisko National Park and no sampling permission was obtained in the year of the survey. However,  
231 50 of these plots were long-term permanent plots for which soil pH measurements were available from  
232 previous soil sampling campaigns conducted in 2018 (using the same sampling and analysis  
233 procedure). The seven remaining plots were in very close (<10 m) proximity to small plots for which  
234 pH was measured in 2018, and we therefore used the mean pH of those plots. Ultimately, pH could be  
235 obtained for all but one plot, assuming that when largely undisturbed – as was the case in the system  
236 – pH-values would only change slightly over time.

237 All soil samples were stored in a fridge at 4°C until they were analyzed between September and  
238 December 2021 at the University of Antwerp, Belgium. To measure soil pH, 25 mL of a KCl solution was  
239 added to 10 g (9.9-10.1 g) of soil. The samples were put in a shaker for an hour and afterward rested  
240 for another 60 min. Then, soil pH was measured with a 914 pH/Conductometer by Metrohm® in the  
241 liquid layer at the top of the sample after shortly manually shaking the tubes.

### 242 **2.4 Online data collection**

#### 243 **2.4.1 Gridded data products**

244 To create the climatic niche models, we collected gridded climate data with a resolution of 30  
245 arcseconds (c.  $1 \times 1 \text{ km}^2$  at the equator) for the annual mean air temperature, annual precipitation,  
246 the mean maximum air temperature of the warmest month, and the mean minimum air temperature  
247 of the coldest month from CHELSA version 1.2, representing the long-term (1979-2013) climatic  
248 conditions (Karger et al., 2017).

249 Soil temperature estimates (i.e., annual mean soil temperature, mean soil minimum temperature of  
250 the coldest month and mean soil maximum temperature of the warmest month) were obtained from  
251 the SoilTemp global maps of soil temperature (Lembrechts et al., 2021). These maps calculated the soil  
252 bioclimatic variables using CHELSA monthly air temperature maps and the offset between gridded air  
253 temperature and in-situ soil temperature measurements from the SoilTemp database (Lembrechts et  
254 al. 2020). The gridded data, representative of the upper soil layer (top 5 cm), had the same resolution  
255 as the CHELSA data, namely 30".

256 Elevation was extracted from the European Digital Elevation Model (DEM) with a resolution of 25 m,  
257 obtained from Copernicus Land Monitoring Service version 1.1 (European Union, 2021).

258 Lastly, the Topographic Wetness Index, a topographical proxy for soil moisture, was obtained from a  
259 TWI raster across Scandinavia, data acquired from Haesen et al. (2021). The TWI raster, which had a  
260 spatial resolution of 25 m, was generated using the method developed by Kopecký et al. (2021).

261 All data were extracted to the according coordinates of every plot in R version 4.2.1 (R Core Team,  
262 2021) using the raster (Hijmans et al., 2012), sp (Pebesma et al., 2005), and GDAL (Mitchel et al., 2014)  
263 packages.

#### 264 **2.4.2 Type of disturbance**

265 For every plot, we assigned a type of disturbance based on its proximity to hiking trails, roads, and  
266 railroad. By visual assessment in QGIS, one of the three disturbance types (hiking trail, road or railroad)  
267 was assigned to every plot. All plots were close to hiking trails, yet whenever the railroad or a road was  
268 within 150 m of the plot, its impact was considered dominant, and the hiking trail classification thus  
269 overruled.

#### 270 **2.4.3 Amount of bare ground**

271 The amount of bare ground (%) as a proxy of disturbance was estimated or calculated for every plot.  
272 For the large plots, this was estimated from the percentage cover of litter and bare ground. This was  
273 calculated for the small plots by summing up all the pins that touched bare ground and litter, dividing  
274 this by the total number of pins in a plot.

#### 275 **2.4.4 Plant functional traits**

276 Average maximum vegetative plant height per species was calculated from the measurements done in  
277 the large plots.

278 The SLA for every species was retrieved from data collected in the framework of the Mountain Invasion  
279 Research Network (MIREN) in the region in 2017 (published as part of the Tundra Trait Team database  
280 (TTT); Bjorkman et al., 2018). The SLA was calculated as leaf area (cm<sup>2</sup>)/dry weight (g). Whenever there  
281 were two or fewer observations (30% of species, n=15) or no data at all (13%, n=6), the data was  
282 completed with values from the global Tundra Trait Team database (Bjorkman et al., 2018). Ultimately,  
283 for 28% (n=14) of the species, we extracted data from the TTT database and for 2% (n=1) of the species  
284 there was no data available. Within the TTT database, only single measurements on an individual - and  
285 thus not e.g., site-specific means - were used.

286 Average seed mass per species was obtained from the global TTT database or – if not available there -  
287 the LEDA Traitbase (Bjorkman et al., 2018; Kleyer et al., 2008). Again, from the TTT database, only  
288 ‘single measurements on an individual’ were used, whereas from LEDA only ‘actual measurements on  
289 individuals’ (no estimations) were used. The TTT database contained seed mass for 28% (n=14) of the  
290 species. An additional 47% (n=23) of the species could be supplemented with seed mass from the LEDA  
291 database.

292 The dispersal type per species was also retrieved from the LEDA Traitbase and used to categorize  
293 species according to their potential for long-distance dispersal (LDD) and short-distance dispersal (SDD)  
294 (Kleyer et al., 2008). For 86% (n=42) of the species this data was available and all were considered long-  
295 distance dispersers, hence this variable was not included in further analyses.

296

297

298



## 299 **2.4.5 Nativeness Index**

300 We used a continuous rather than a binary measure of the status of a species within a region, to get a  
301 more accurate view of the history of the species. Our Nativeness Index (NI) used historical surveys  
302 from the Global Biodiversity Information Facility ([GBIF](#)) database. It considered the first year a species  
303 was observed (year first occurrence species) and the first year in which more than 50 species were  
304 observed in the region (year first survey). If the NI was close to 1, the species was already observed at  
305 the time of the first survey. As the value approached 0, the species was observed increasingly recently  
306 for the first time and was thus more likely to be non-native.

$$307 \quad NI = \frac{\sqrt{\text{year (2020)} - \text{year first occurrence species}}}{\sqrt{\text{year (2020)} - \text{year first survey (1850)}}$$

308 Square roots were used in the formula to give more weight to recent differences (e.g., a first  
309 observation in 2010 vs 2020 is considered a more substantial difference than one in 1900 vs 1910). The  
310 first occurrence and the year of the first survey were obtained using the *rgbif* package (Chamberlain  
311 et al., 2021).

## 312 **2.4.6 Mycorrhizal associations**

313 The association of plant species with the main types of mycorrhizal fungi (AM = arbuscular mycorrhiza,  
314 EcM = ectomycorrhiza, ErM = ericoid mycorrhiza and NM = no mycorrhiza) was retrieved from the  
315 FungalRoot database (Soudzilovskaia et al., 2020). This data was available for 92% (n=42) of the  
316 species. For the remaining 8% (n=7) for which species-level information was absent, the mycorrhizal  
317 type was derived at the family level (i.e., the most common mycorrhizal type within the family).

## 318 **2.5 Data-analysis**

319 All statistical analyses were conducted in R version 4.2.1 (R Core Team, 2021).

### 320 **2.5.1 Dark diversity modeling**

321 For further analysis, only the most common species, i.e., species with 10 or more observations, were  
322 included (n=49), as sufficient observations were needed to calibrate climatic niche models and build  
323 co-occurrence matrices. We then used the same dataset in four different approaches to estimate dark  
324 diversity.

#### 325 Climatic niche modeling

326 The presence and absence of all species in every plot was used to make climatic niche models. For  
327 every species, a Generalized Linear Model was made, with a binomial distribution containing all  
328 climatic variables and their quadratic terms as explanatory variables (i.e., annual mean air  
329 temperature, annual precipitation, maximum air temperature of the warmest month, minimum air  
330 temperature of the coldest month, annual mean soil temperature, minimum soil temperature of the  
331 coldest month, and maximum soil temperature of the warmest month) and presence/absence (1/0) of  
332 a species per plot as the response variable. Multicollinearity was checked using the Variance Inflation  
333 Factor (VIF) from the *car* package (Fox & Weisberg, 2019) and variables that increased the VIF to 5 or  
334 more were removed. The final models contained: annual precipitation, minimum soil temperature of  
335 the coldest month, maximum soil temperature of the warmest month, and their quadratic terms. No  
336 further model selection was done as we were not interested in a model identifying the drivers of the  
337 species' climatic niche, but rather wanted to approximate their climatic niche as consistently as  
338 possible.

339 To predict the probability of a species' occurrence in a specific plot, the GLM was fit on the remaining  
340 plots (Lembrechts et al., 2019) and the probability was estimated for that specific plot. This leave-one-  
341 out procedure was then repeated for all plots and all species. We then calculated the relative dark  
342 diversity per plot by averaging the predicted presence of each absent species in a plot and the dark  
343 diversity probability per species by averaging the predicted presence of a species across all plots where  
344 it was absent.

345 The second method to estimate the dark diversity used the same climatic niche model as above. Yet,  
346 instead of continuous probability estimates, we converted niche model predictions into  
347 presence/absence estimates. For this, we calculated species-specific thresholds for presence using the  
348 function *ecospat.max.tss* from the *ecospat* package (Broennimann et al., 2022) which chooses the  
349 threshold that maximizes values for the True Skill Statistic (TSS), which assesses the accuracy of species  
350 distribution models (Allouche et al., 2006). Based on this, we created a binary dataset where the values  
351 below the threshold got a 0 (predicted to be absent) and the values above got a 1 (predicted to be  
352 present). Afterward, we removed the values where the species was observed to be present based on  
353 the vegetation surveys. To calculate the species-level dark diversity probability, we used the formula  
354 proposed by Moeslund et al. (2017), using the number of plot-level observations and predictions:

$$355 \frac{\# \text{ times in dark diversity}}{\# \text{ times in species pool}}$$

356 To calculate the relative plot-level dark diversity:

$$357 \frac{\# \text{ species in dark diversity}}{\# \text{ species in species pool}}$$

358 The habitat-specific species pool consisted of both the observed and dark species. Note that at the  
359 species level, we are estimating the probability that a species belongs to the dark diversity (dark  
360 diversity probability), while at the plot-level, we are estimating the percentage of species from the  
361 species pool that is absent (dark diversity *per se*).

#### 362 Beals' method

363 Two co-occurrence-based methods to estimate the dark diversity were used, with the first being the  
364 Beals' index (Beals, 1984), as applied by Lewis, Szava-Kovats & Pärtel (2016). We first built a species  
365 co-occurrence matrix, then calculated the Beals' index, using the *beals* function from the *vegan*  
366 package, for each species in every plot, excluding the focal species as suggested by Oksanen et al.  
367 (2022). The thresholds used to decide whether a species was part of the regional species pool were  
368 species-specific and defined as the 5th percentile of the Beals' index value for the species (Gijbels,  
369 Adriaens & Honnay, 2012). Before calculating each threshold, the lowest value of the Beals' index was  
370 determined among the plots containing occurrences of the species in question, and all plots with  
371 values below this lowest value were discarded (Moeslund et al., 2017). For each plot, the dark diversity  
372 then consisted of all species from the habitat-specific species pool, except those present (Pärtel, Szava-  
373 Kovats & Zobel, 2011). To calculate the plot- and species-level dark diversity probability the same  
374 formulae as for the species-specific threshold were used.

#### 375 Hypergeometric method

376 The second method used to estimate the dark diversity was the hypergeometric method, as proposed  
377 by Carmona & Pärtel (2020). This method avoids the binary form in which dark diversity is often  
378 defined. The co-occurrence matrix used for the Beals' method was also employed in this case. To get  
379 estimates of the dark diversity, we used the function *DarkDiv* from the *DarkDiv* package, with the

380 argument ‘method’ containing ‘Hypergeometric’ (Carmona & Pärtel, 2020). We applied this method  
381 to all species in all plots for which we obtained a probability that the species could be present in that  
382 plot. Afterward, all values for plots where the species were observed to be present were removed. To  
383 calculate the relative plot-level dark diversity, per plot the mean was taken from the remaining values.  
384 The same was done for the species-level dark diversity, yet here the mean was taken per species.

### 385 **2.5.2 Drivers of relative plot-level dark diversity**

386 To investigate why certain plots had a higher relative dark diversity, we created generalized linear  
387 mixed models (GLMMs) with a beta distribution and logit-link function using the *glmmTMB* package  
388 (Brooks et al., 2017), with predictions from each of the four dark diversity indices (the two approaches  
389 based on niche models, the Beals’ index, and the hypergeometric approach) as a response variable.

390 These plot-level models contained elevation, soil pH, type of disturbance, amount of bare ground, TWI,  
391 observed species richness and plot size as explanatory variables. The plots were situated along various  
392 trails. To account for this hierarchical sampling design, the model included a random intercept for plot  
393 number nested within trail identity. Multicollinearity and distribution of residuals were checked using  
394 the Variance Inflation Factor (VIF) and the *DHARMA* package (Hartig, 2022) and deemed not violated.  
395 Due to the low sample size, we limited ourselves to linear patterns and did not include two-way  
396 interactions since these more complex models could not converge. For the same reason, quadratic  
397 effects were not tested, even though theoretically they could be expected for pH and soil moisture.  
398 However, within our study system both the pH and moisture gradient only reached extreme values on  
399 one side of the gradient (e.g., highly acidic yet no highly basic soils).

400 No further model selection was performed (Hartig, 2018). The variance explained by the full model  
401 was obtained using the *performance* function from the *performance* package (Lüdecke et al., 2021).  
402 To determine the proportion of explained variance of every variable, we followed a variation  
403 partitioning approach. First, the variance of the full model was calculated. Afterward, for every  
404 explanatory variable, a model was made consisting of all variables except the focal variable. By  
405 extracting the marginal  $R^2$  of the individual models from the  $R^2$  of the full model, the variance of the  
406 focal variable was obtained (Legendre & Legendre, 1998).

### 407 **2.5.3 Drivers of species-level dark diversity probability**

408 To investigate why certain species had a higher dark diversity probability, we created general linear  
409 models (GLMs) with a beta distribution and logit-link function using the *betareg* package (Cribari-Neto  
410 & Zeileis, 2010) with predictions from each of the used dark diversity indices (based on the niche  
411 models, the Beals’ index, and the hypergeometric approach) as a response variable.

412 First, full models were made separately for each dark diversity index that contained the nativeness  
413 index, maximum vegetative plant height, specific leaf area, dispersal type, seed mass, and mycorrhizal  
414 association as explanatory variables and species-level dark diversity as the response variable.  
415 Assumptions of multicollinearity and distribution of residuals were tested and not violated. Here as  
416 well, two-way interactions could not be tested and no further model selection was performed (Hartig,  
417 2018). Afterward, pairwise comparisons were conducted on the categorical parameters using the  
418 *emmeans* package (Lenth, 2022).

419

420

421

## 422 3 Results

### 423 3.1 Plot-level dark diversity

424 Depending on the method, we could explain between 39% and 80% of the variance in plot-level dark  
425 diversity. In one case (climatic niche models), elevation was responsible for the largest share, while in  
426 the three other cases (species-specific threshold, Beals' index and hypergeometric method) species  
427 richness was the most dominant factor (Figure 3). On average across all models, elevation explained  
428 11%, species richness 10%, and plot size, type of disturbance, amount of bare ground, pH and TWI an  
429 additional 2%, 2%, 3%, 4% and 1%. Note that due to the nature of the variance partitioning calculations,  
430 variances do not necessarily add up to the total variance of the full model.

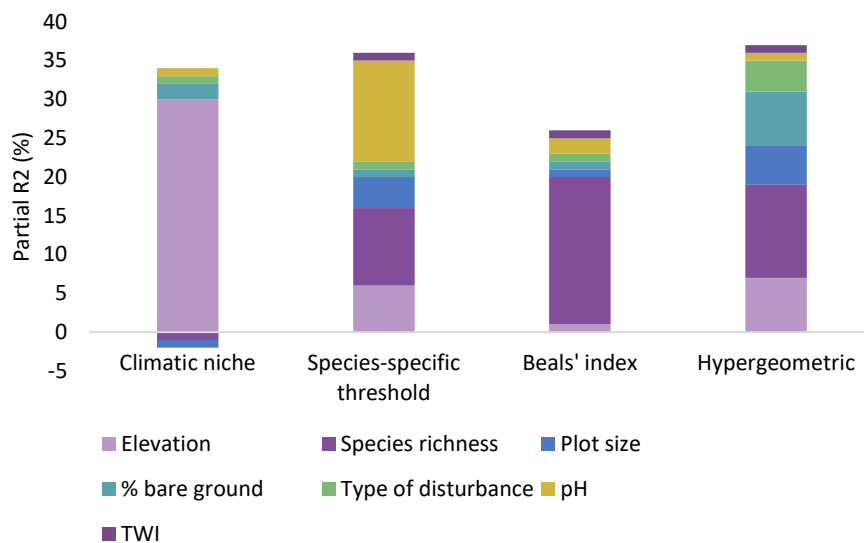

431

432 *Figure 3: Variance partitioning (expressed in % and calculated using the marginal R<sup>2</sup>) of the different*  
433 *explanatory variables in the GLMMs of the plot-level analyses on the predictions of each of the four*  
434 *different dark diversity methods. TWI = Topographic Wetness Index.*

435 In three out of the four methods used, the plot-level dark diversity decreased significantly across the  
436 elevation gradient (Table 1; Figure 4). Only in the model based on the Beals' index did elevation not  
437 have a significant influence (Table 1; Figure 4D)

438

439

440

441

442

443

444

445 *Table 1: Models explaining the plot-level dark diversity using the different dark diversity estimation*  
 446 *methods: coefficients (p-values: \* p≤0.05; \*\* p≤0.01; \*\*\* p≤0.001). The factor used for the intercept*  
 447 *was allocated alphabetically and all other factors were compared to this baseline. CN = Climatic Niche*  
 448 *models; SS = Species-specific threshold; Hyper = Hypergeometric method; Beals = Beals' index; Elev =*  
 449 *elevation; SR = Species Richness; TOD = Type Of Disturbance; TWI = Topographic Wetness Index.*

| Model | Intercept<br>(Road) | Elev              | SR                | Plot<br>size<br>(10x10<br>m <sup>2</sup> ) | TOD<br>Hiking<br>trail | TOD<br>Railroad | % bare<br>ground  | pH                | TWI    | AIC  |
|-------|---------------------|-------------------|-------------------|--------------------------------------------|------------------------|-----------------|-------------------|-------------------|--------|------|
| CN    | -0.327              | -<br>0.00<br>1*** | -<br>0.029**<br>* | 0.079                                      | 0.524                  | -0.251          | -0.001*           | -0.022            | -0.014 | -370 |
| SS    | 3.00***             | -<br>0.00<br>1**  | -<br>0.105**<br>* | -0.408*                                    | 0.281                  | -0.165          | -0.001            | -<br>0.262*<br>** | 0.038  | -140 |
| Hyper | 0.102               | -<br>0.00<br>1**  | 0.001**<br>*      | -0.183                                     | 0.425                  | 0.001           | -<br>0.012**<br>* | 0.065             | -0.011 | -230 |
| Beals | 1.04*               | 10 <sup>-4</sup>  | -<br>0.082**<br>* | -0.121                                     | -0.112                 | -0.345          | 0.001             | 0.032             | 0.001  | -195 |

450

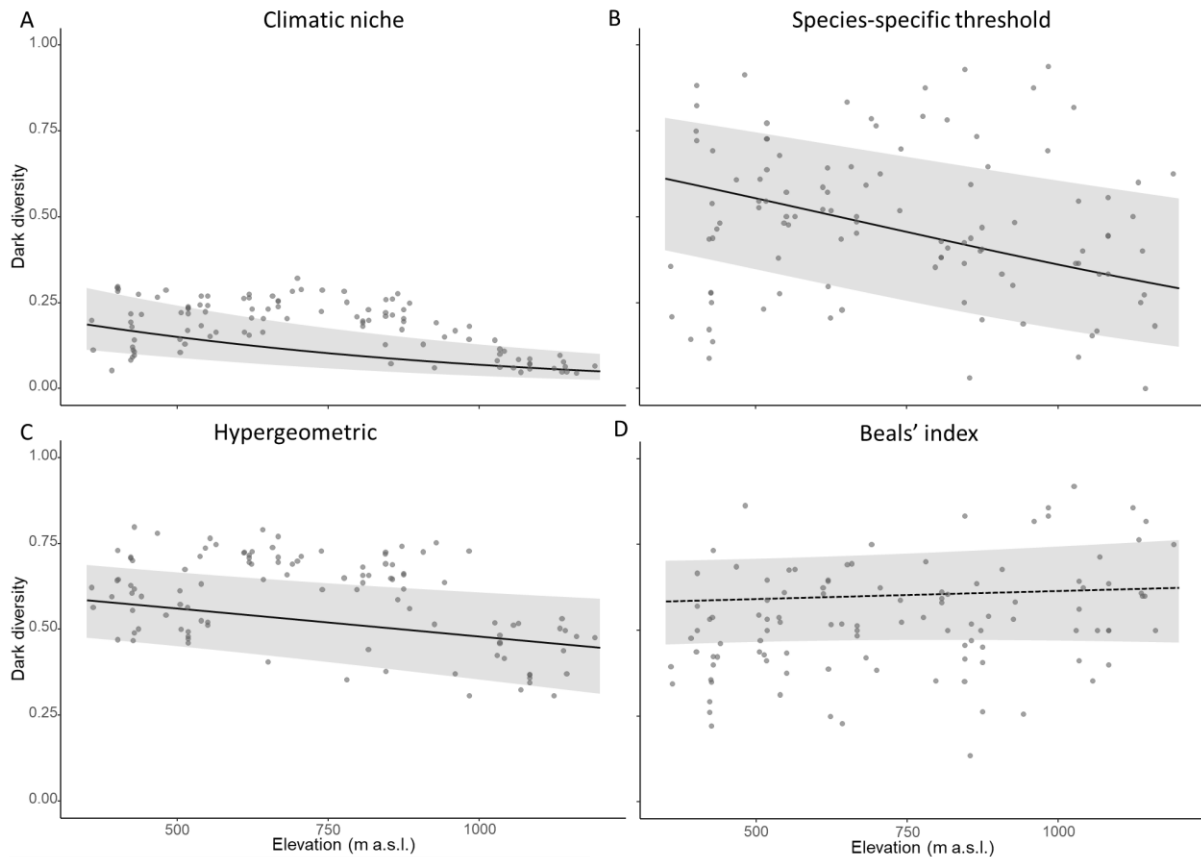

451  
452 *Figure 4: Marginal effects plots of the plot-level dark diversity as a function of elevation (m a.s.l.). The*  
453 *grey area indicates the 95% confidence interval, the grey dots are the raw data points, and the dotted*  
454 *line indicates non-significance. Dark diversity estimated using A) the climatic niche models, B) the*  
455 *climatic niche models followed by the species-specific threshold, C) the hypergeometric method and D)*  
456 *the Beals' index.*

457 The plot-level dark diversity decreased significantly with increasing species richness in three cases  
458 (Table 1; Figure 5A, 5B, 5D), yet increased significantly with increasing species richness when using the  
459 hypergeometric method (Table 1; Figure 5C).

460

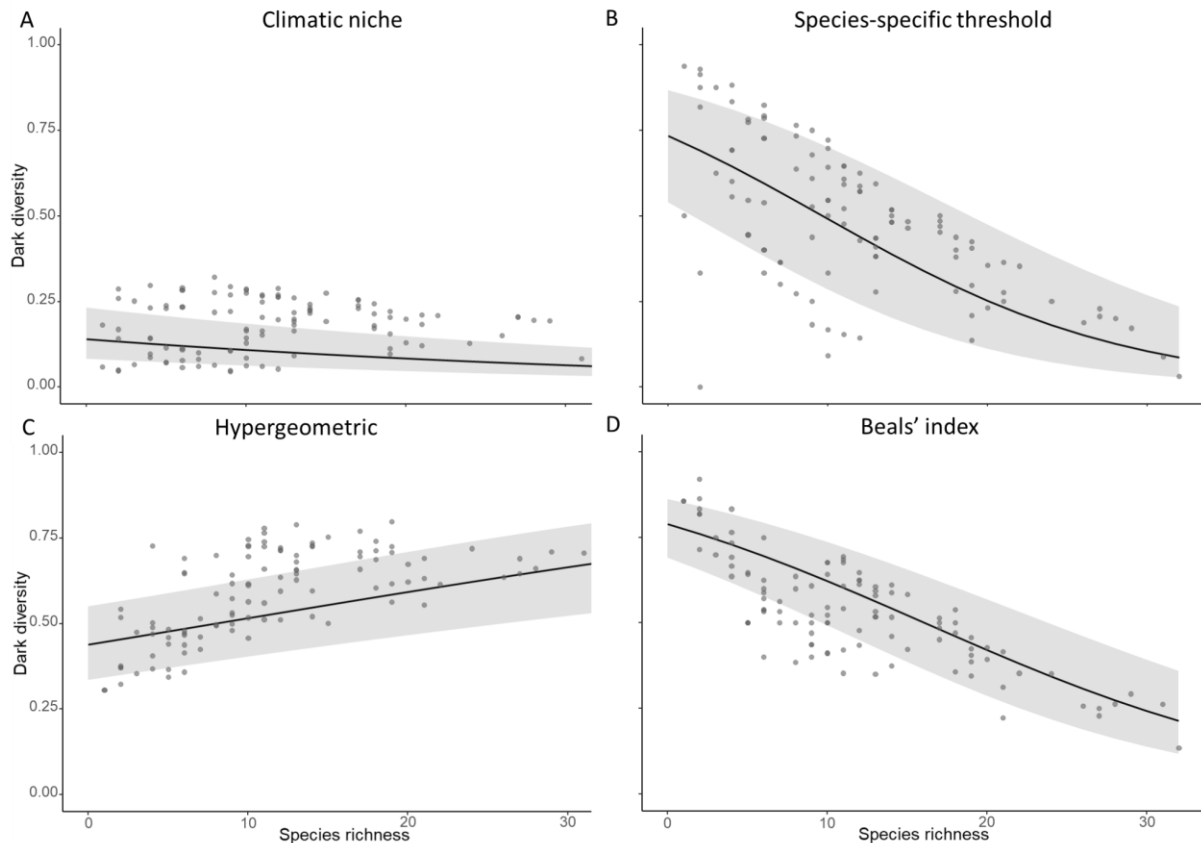

461

462 *Figure 5: Marginal effects plots of the plot-level dark diversity as a function of species richness. The*  
463 *grey area indicates the 95% confidence interval, and the grey dots are the raw data points. A) the*  
464 *climatic niche models, B) the climatic niche models followed by the species-specific threshold, C) the*  
465 *hypergeometric method and D) the Beals' index.*

466 Moreover, the dark diversity decreased significantly with increasing amounts of bare ground when  
467 using the hypergeometric method (Table 1; Figure 6B) and the climatic niche models (Table 1; Figure  
468 6A). In these models there was also some support that plots near a hiking trail showed a slightly higher  
469 dark diversity probability than plots closer to a road or railroad, although not significantly so (climatic  
470 niche:  $z = 1.65$ ,  $p = 0.099$ ; hypergeometric:  $z = 1.80$ ,  $p = 0.071$ ; Table 1; Figure 6C, D). The larger plots  
471 ( $10 \times 10 \text{ m}^2$ ) also had a significantly lower dark diversity compared to the smaller plots ( $1 \times 1 \text{ m}^2$ ) when  
472 using the climatic niche models followed by the species-specific threshold (Table 1; Figure 6E) and the  
473 hypergeometric method (Figure 6F), although in the latter not significantly (Table 1). Lastly, when using  
474 the climatic niche model followed by the species-specific threshold, the dark diversity decreased  
475 significantly with increasing pH (Table 1; Figure 6G), while the opposite was true for the  
476 hypergeometric method, albeit not significantly ( $z = 1.81$ ;  $p = 0.057$ ) (Table 1; Figure 6H).

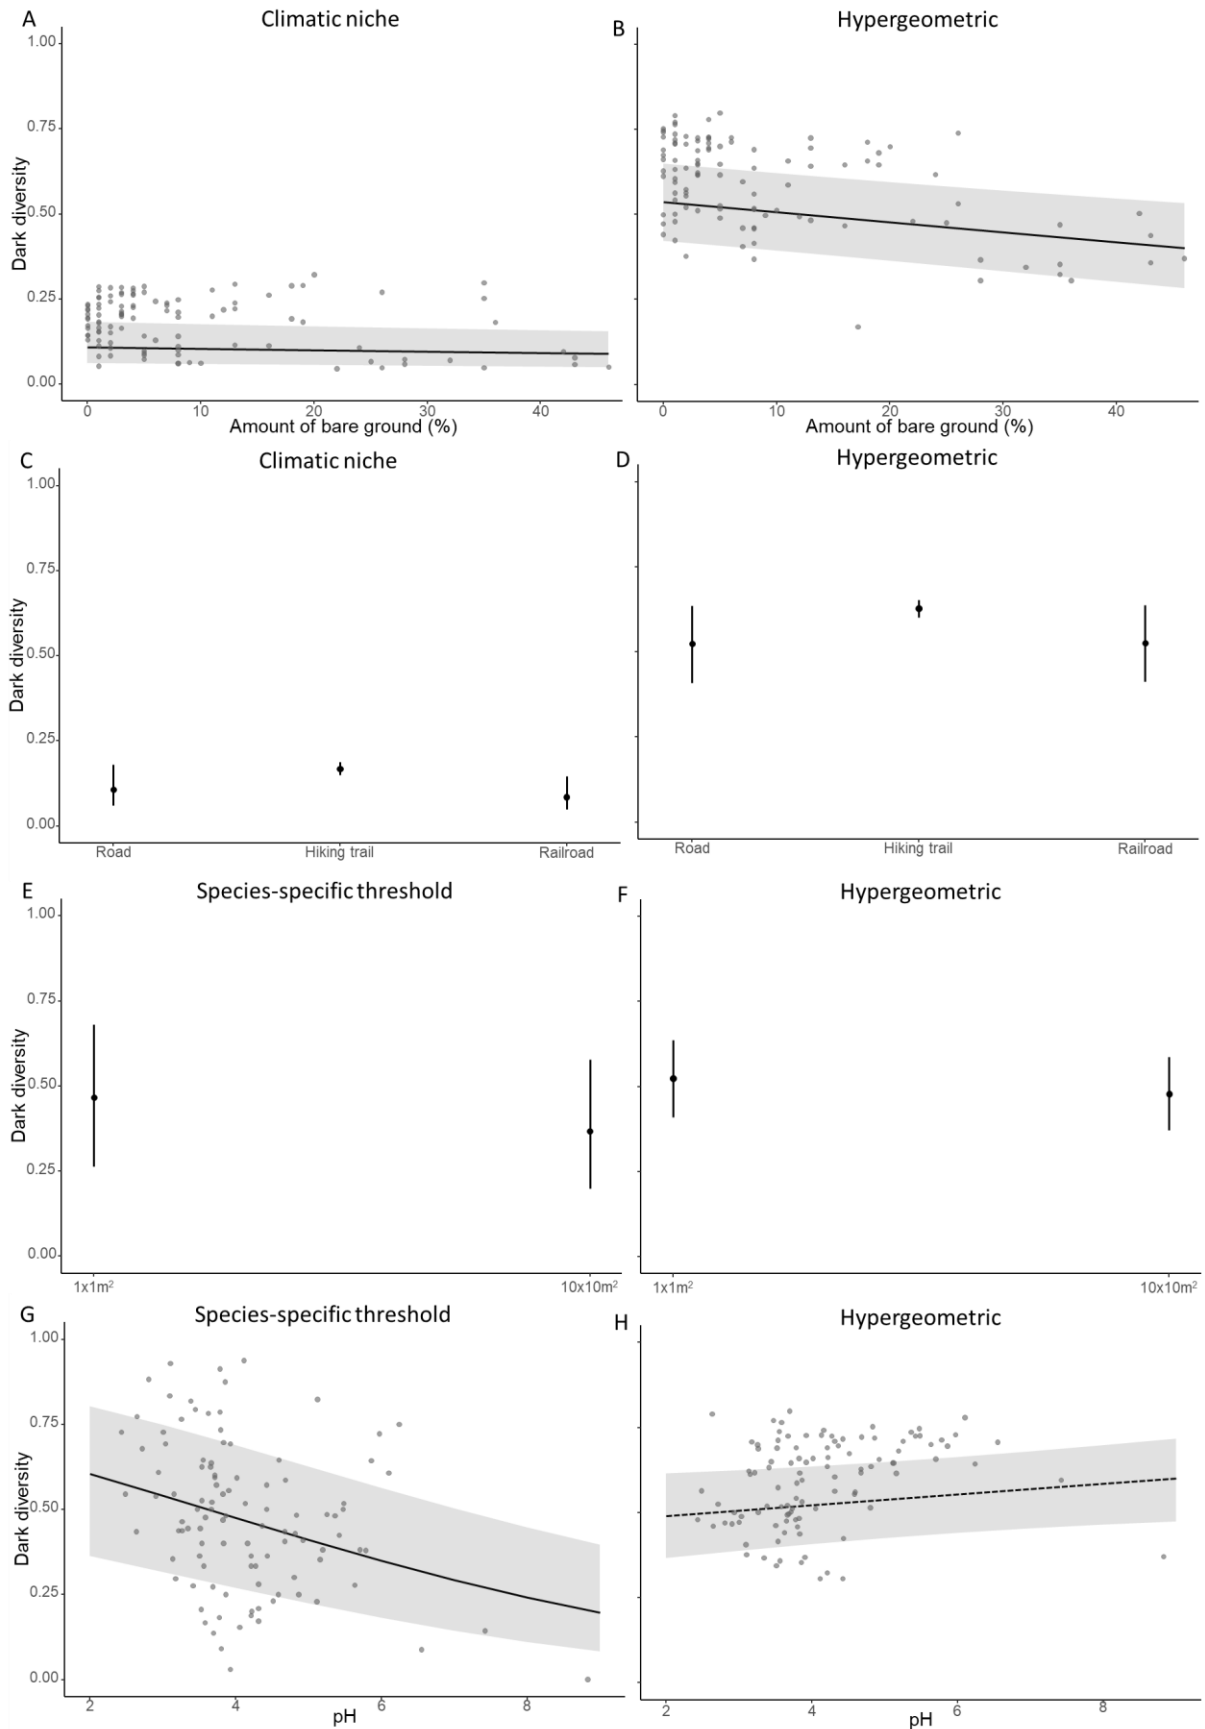

477

478 *Figure 6: Marginal effects plots of the plot-level dark diversity as a function of the A/B) amount of bare*  
479 *ground, C/D) type of disturbance, E/F) plot size and G/H) pH. The black dots show the average dark*



480 *diversity per individual factor whereas the error bars show the standard deviation. The grey area*  
481 *indicates the 95% confidence interval, the grey dots are the raw data points and the dotted line*  
482 *indicates non-significance. Dark diversity was estimated using A/C) the climatic niche models, E/G) the*  
483 *climatic niche models followed by the species-specific threshold and B/D/F/H) the hypergeometric*  
484 *method.*

### 485 3.2 Species-level dark diversity

486 Depending on the method, we could explain between 15% and 45% of the variance in species-level  
487 dark diversity (Figure 7). In all cases, mycorrhizal association was responsible for the largest share  
488 (Figure 7). On average across all models, mycorrhizal association explained 18%, seed mass 8%, specific  
489 leaf area 3% and the nativeness index and the maximum vegetative plant height an additional 2%.  
490 Note that due to the nature of the variance partitioning calculations, variances do not necessarily add  
491 up to the total variance of the full model.

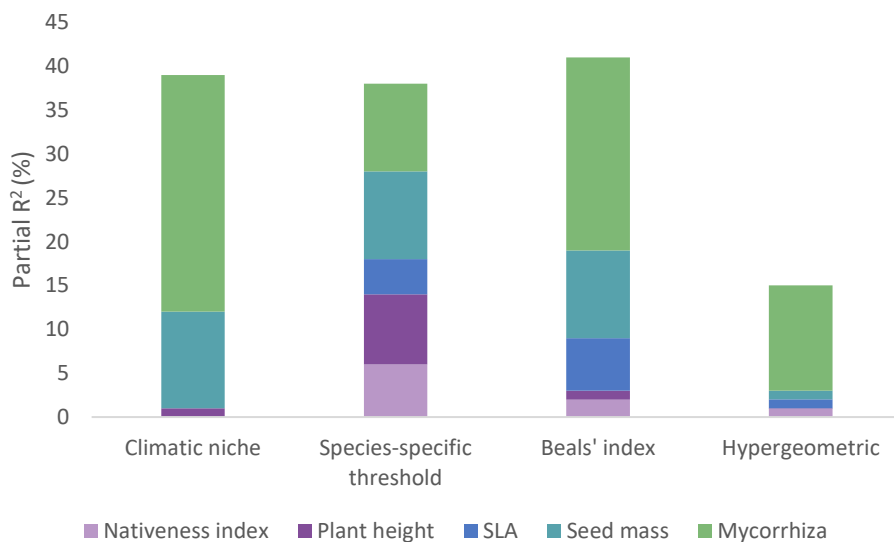

492

493 *Figure 7: Variance partitioning (expressed in % and calculated using the marginal  $R^2$ ) of the different*  
494 *explanatory variables in the GLMMs of the species-level analyses on the predictions of each of the four*  
495 *different dark diversity methods. SLA = Specific Leaf Area.*

496 Mycorrhizal status was the only significant parameter in the climate niche model approach, with  
497 ericoid mycorrhizae differing significantly from AM, EcM and NM (Figure 8; Table 2; Appendix S1).  
498 Species with a symbiotic ericoid mycorrhizal association had a significantly higher dark diversity than  
499 all other associations when using the climatic niche models (Table 2; Figure 8A). However, the opposite  
500 was true when using the three other methods (Table 2; Figure 8B, C, D). For the Beals' index the  
501 contrast test also revealed ericoid mycorrhizae differing significantly from AM, EcM and NM (Figure  
502 8D, Appendix S1). For the other two methods, the contrast test only showed a borderline significant  
503 difference between ErM and NM for the species-specific threshold and ErM AM for the  
504 hypergeometric method (Figure 8B, C; Appendix S1).

505

506

507 *Table 2: Models explaining the plot-level dark diversity using the different dark diversity estimate*  
 508 *methods: coefficients (p-values: \*  $p \leq 0.05$ ; \*\*  $p \leq 0.01$ ; \*\*\*  $p \leq 0.001$ ). The factor used for the intercept*  
 509 *was allocated alphabetically and all other factors were compared to this baseline. CN = Climatic Niche*  
 510 *model; SS = Species-specific threshold; Hyper = Hypergeometric method; Beals = Beals' index; AM =*  
 511 *Arbuscular Mycorrhiza; EcM = Ectomycorrhiza; ErM = Ericoid Mycorrhiza; NM = No Mycorrhiza; MVH =*  
 512 *Maximum Vegetative plant Height; SLA = Specific Leaf Area; NI = Nativeness Index; SM = Seed Mass.*

| Model | Intercept (AM) | EcM    | ErM      | NM     | MVH        | SLA        | NI    | SM     | AIC |
|-------|----------------|--------|----------|--------|------------|------------|-------|--------|-----|
| CN    | -0.043         | 0.108  | 1.17***  | -0.101 | $-10^{-4}$ | $-10^{-4}$ | -1.37 | -0.068 | -72 |
| SS    | -5.96          | 0.453  | -0.916*  | 0.208  | $-10^{-3}$ | $-10^{-3}$ | 6.95  | 0.082  | -11 |
| Hyper | 0.102          | -0.167 | -0.965*  | -0.067 | $10^{-4}$  | 0.001      | 1.20  | -0.040 | -12 |
| Beals | 1.04*          | 0.170  | -1.17*** | 0.193  | $-10^{-4}$ | -0.001     | -3.28 | -0.089 | -19 |

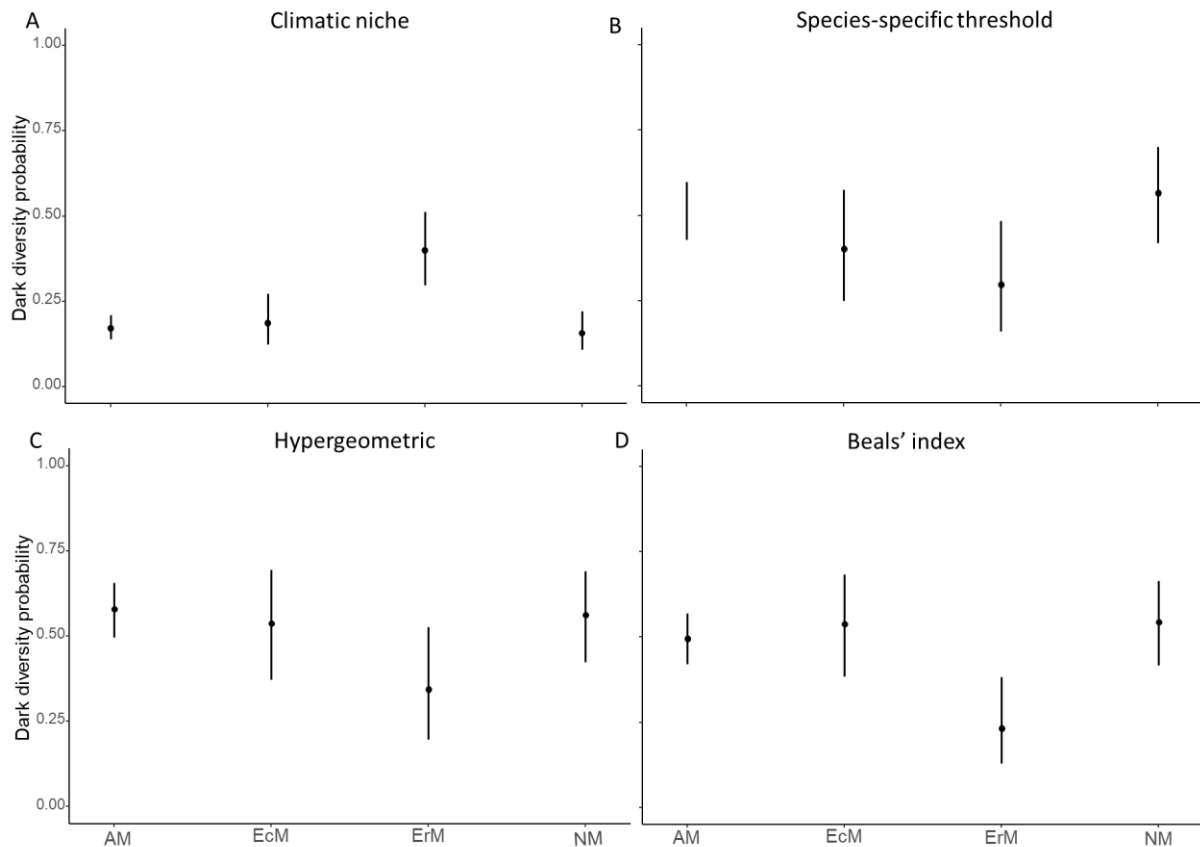

513  
514 *Figure 8: Prediction of the species-level dark diversity in relation to the type of mycorrhizal association*  
515 *based on the beta regression model. The black dots show the average dark diversity per individual*  
516 *factor whereas the error bars show the standard deviation. AM = Arbuscular Mycorrhiza; EcM =*  
517 *Ectomycorrhiza; ErM = Ericoid Mycorrhiza; NM = No Mycorrhiza. Dark diversity estimated using A) the*  
518 *climatic niche models, B) Species-specific threshold, C) the hypergeometric method and D) the Beals'*  
519 *index.*

520 Even though none of the other parameters had a significant influence on the species-level dark  
521 diversity, there is some support that the species-level dark diversity increased with increasing  
522 nativeness index (Figure 9B;  $z = 1.84$ ,  $p = 0.067$ ) and decreased with increasing maximum vegetative  
523 plant height (Figure 9A;  $z = -1.75$ ,  $p = 0.080$ ) when using the climatic niche model followed by the  
524 species-specific threshold, albeit both not significantly so. Lastly, there is also an indication ( $z = -1.86$ ,  
525  $p = 0.062$ ) that the dark diversity decreased with increasing SLA when using the Beals' index (Figure  
526 9C).

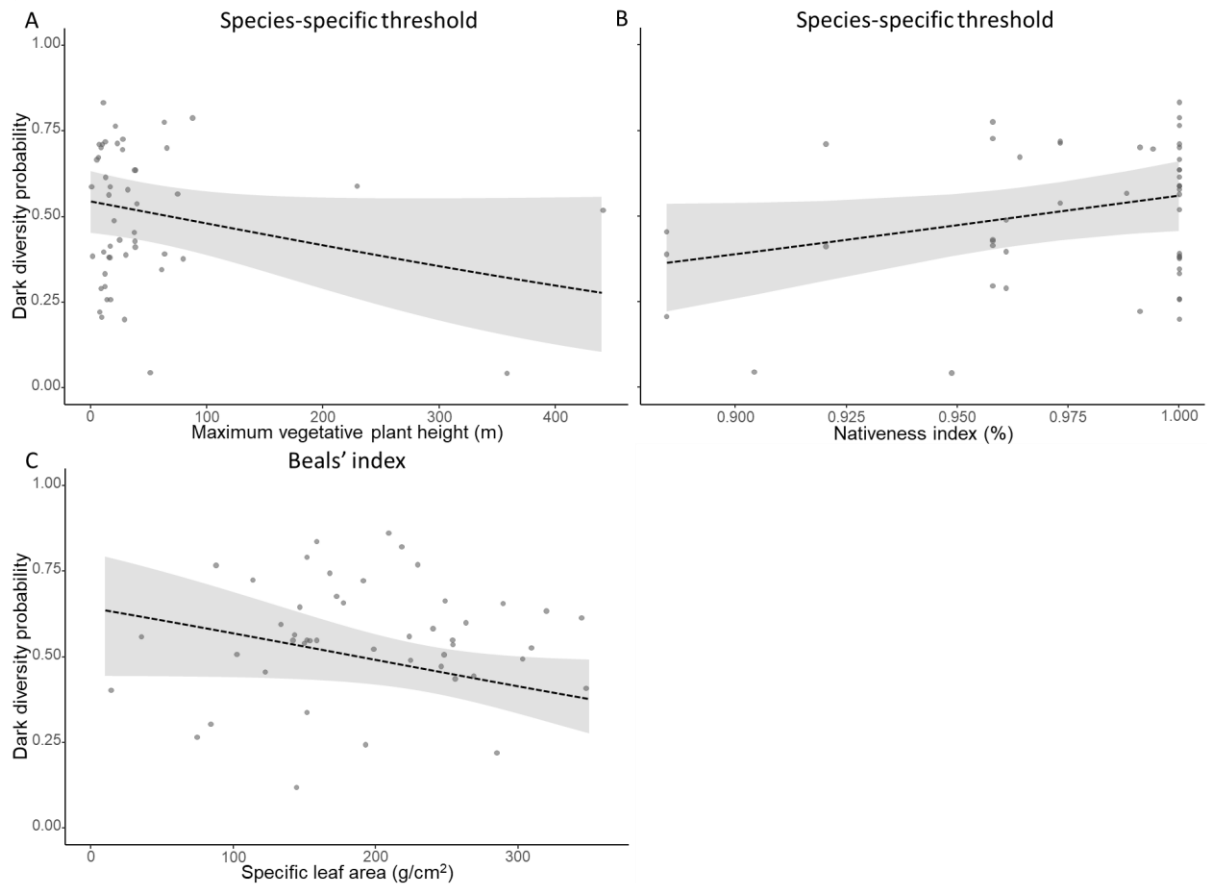

527

528 *Figure 9: Marginal effects plots of the species-level dark diversity as a function of the A) Maximum*  
529 *vegetative plant height, B) Nativeness index and C) Specific leaf area. The dotted line indicates non-*  
530 *significance whereas the grey area indicates the 95% confidence interval and the grey dots are the raw*  
531 *data points. Dark diversity was estimated using A/B) the climatic niche models followed by the species-*  
532 *specific threshold, C) the Beals' index.*

## 533 4. Discussion

### 534 4.1. Plot-level dark diversity

535 We found relatively consistent patterns in the drivers of dark diversity at the plot-level, but much less  
536 consistency was observed at the species level. Plot-level dark diversity was most consistently related  
537 to elevation, with plots at higher elevations having a lower plot-level dark diversity - and thus fewer  
538 expected species missing - than plots at lower elevations. This was true for both niche-based methods  
539 as well as for the hypergeometric method, yet not for the Beals' index, in which elevation was not  
540 significant. Such a decline with elevation is in line with ecological theory. Indeed, under harsh  
541 environmental conditions, competitive interactions are often replaced by mutualistic ones, or  
542 competition is at least lowered in intensity, thereby reducing the exclusion of less competitive species  
543 with a lower dark diversity as a result (Callaway et al., 2002; Klanderud, 2010; Lembrechts et al., 2018).  
544 Additionally, the presence of more ruderal and competitive species in the lowlands compared to the  
545 stress-tolerant species higher up in the mountains along roadsides also suggests that reduced  
546 competition can be one of the main drivers behind the lower dark diversity at higher elevations  
547 (Lembrechts et al., 2014). Furthermore, climatic conditions are usually milder in the lowlands, making  
548 them suitable for a broader set of species (Körner, 2021). Consequently, since more species can be

549 present in these plots, it is also more likely that at least some of them are excluded, resulting in a  
550 higher number of species belonging to the dark diversity. As the co-occurrence-based metrics  
551 accounted for some of these factors (e.g., lower expectancy of species in plots dominated by species  
552 that traditionally outcompete them), it should come as no surprise that elevation was not significant  
553 in the model for the Beals' index, and that the decline in dark diversity with elevation was the least  
554 steep for the hypergeometric method.

555 Species richness was identified as a key driver of plot-level dark diversity with all four methods. Its  
556 effect was negative for all but the hypergeometric method, thus largely following our hypothesis. In  
557 this system, plots with a low number of species are likely to be dominated by highly competitive  
558 species, which will prevent the establishment of several species that could in theory occur there  
559 (Pellissier et al., 2010). Indeed, plots with a low species richness in the study system were often  
560 dominated by black crowberry. It is an efficient competitor for nutrients, can grow on soils with low  
561 pH, and has allelopathic effects against seed germination and the growth of surrounding species  
562 (Tybirk et al., 2000), thus effectively referring several species from the regional species pool locally to  
563 the dark diversity. Nevertheless, it is possible that approaches based on species co-occurrences, such  
564 as the hypergeometric method and the Beals' index, already account for this effect of competition.  
565 The latter potentially explains the observed positive relationship between species richness and dark  
566 diversity when using the hypergeometric method. Given the consistent negative relationship of dark  
567 diversity with elevation (see above), it is not unlikely that the effects of species richness and elevation  
568 would interact, with higher dark diversity especially in lowland plots with higher species richness, yet  
569 we lacked the sample size to explore such interactions statistically.

570 Finally, we found some support for the type of disturbance and percentage of bare ground as drivers  
571 of the plot-level dark diversity, while the results for soil pH were largely inconclusive. In two models,  
572 dark diversity tended to be lower in plots closer to the road - though none significantly so. Similarly, in  
573 two methods the dark diversity was found to decline significantly with increasing bare ground cover.  
574 Both point in the direction of a decreased dark diversity with increasing disturbance, a finding in line  
575 with other studies in the region. Indeed, bare ground cover could serve as a proxy for disturbance, with  
576 plots with virtually no bare ground usually being in late-successional stages (Lembrechts et al., 2014).  
577 In the Scandinavian tundra and other arctic, subarctic or alpine areas, late-successional stages –  
578 especially at low elevations - are often dominated by black crowberry, lingonberry or related species  
579 (Tybirk et al., 2000). As a result, these undisturbed plots are dominated by a few late-successional  
580 competitors, which can explain their higher dark diversity. More frequent disturbances, on the other  
581 hand, can result in more bare ground, which creates opportunities (empty niches) for species to  
582 establish and thus result in a lower dark diversity in these plots (Prieur-Richard & Lavorel, 2000).  
583 Lembrechts et al. (2014), for example, found in the same region a higher species diversity along  
584 disturbed roadsides than in natural communities owing largely to competitive release, a conclusion  
585 that found some support here in our observed lower dark diversity close to a road and the railroad, at  
586 least with some methods. Initially, we expected that disturbance by roads or railroads would result in  
587 a higher plot-level dark diversity because many stress-tolerant mountain species would not be able to  
588 cope with these disturbances (Auerbach et al., 1997). However, this would only be the case if the  
589 disturbance would be sufficiently intense to reduce species richness, which rarely – if ever – happened  
590 in our study plots, given our sampling focus on undisturbed vegetation only. Therefore, the same  
591 explanation as for bare ground stands, i.e., plots that were more disturbed created opportunities for  
592 species to establish, resulting in a lower plot-level dark diversity (Lembrechts et al., 2014).

593

## 594 **4.2 Species-level dark diversity**

595 Mycorrhizal association was the only variable with significant influence on the species-level dark  
596 diversity across all methods. However, while species with a symbiotic ericoid mycorrhizal association  
597 had a significantly higher dark diversity than all other associations when based on the climatic niche  
598 models, the opposite was true when using the other three methods. These contrasting results highlight  
599 the differences between these dark diversity estimation methods. In this system, the species with an  
600 ErM association (e.g. black crowberry and lingonberry) were virtually not climate-limited (occurring in  
601 64 and 63 out of the 107 plots, respectively) and could in theory, based on their climatic niche, be  
602 present in all plots. Therefore, their dark diversity probability ended up being very high in any plot  
603 where they were absent, simply because of the underlying modelling approach. This issue was  
604 corrected by using species-specific thresholds, in which case mycorrhizal type was not withheld as  
605 significant.

606 These ErM-associated species not only dominated the landscape, but they were also often found in  
607 strong association with each other, resulting in clear predictions of their presence once one of them  
608 was present, when using the co-occurrence-based method. As their spatial connection in the field was  
609 so consistent, their estimated dark diversity using these methods ended up relatively low. Additionally,  
610 as ErM-fungi are the most dominant and widespread fungi in tundra regions (Tendersoo, 2017), in  
611 theory, there ought to be enough coverage of ErM-fungi so that the establishment of species  
612 associated with them should not be hampered. Consequently, there should be less reason for the  
613 species to be absent in areas where they could potentially occur than for AM-associated species  
614 (Tendersoo, 2017). All of this suggests that the observed higher dark diversity estimates for ErM-  
615 associated species by the climatic niche-approach are most likely a methodological artefact. These  
616 methodological issues could also explain why such little consistency was observed for the other studied  
617 drivers of species-level dark diversity, calling for caution when interpreting findings from any such dark  
618 diversity estimate separately.

## 619 **4.3 Comparison of methods and uncertainties**

620 In this paper, we estimated dark diversity using both niche-based and co-occurrence-based methods  
621 with both approaches often used interchangeably in literature. However, our results show that both  
622 approaches have significantly different assumptions and, as a result, get relatively incomparable  
623 results. Indeed, the niche-based approaches estimate the dark diversity as the set of species that could  
624 occur at a certain location based on their climatic niche or other environmental filters. The latter  
625 drivers are then often used as explanatory variables for the observed dark diversity, as done in the  
626 underlying study. For example, reduced competitive interactions in sites with larger percentages of  
627 bare ground would result in lower dark diversity, as is hinted at by our results.

628 Co-occurrence-based methods, on the other hand, estimate dark diversity simply by the neighbouring  
629 species with which a target species is usually associated. These approaches incorporate biotic  
630 interactions inherently in the dark diversity estimate. However, they do exclude species from the dark  
631 diversity for which the climatic conditions fall within their climatic limits, yet whose co-occurring  
632 species are also missing at a site. The latter could be especially problematic in diverse communities  
633 with high beta diversity, or areas with truncated, reduced, or novel communities as a result of  
634 anthropogenic land use or climatic changes (Christensen et al., 2021).

635 Perhaps more worryingly, within each type of dark diversity estimation method, results were not  
636 necessarily in agreement with each other. We found largely different findings, especially for species-

637 level dark diversity, when using climatic niches with or without species-specific thresholds, as well as  
638 when using the hypergeometric method versus the Beals' index. As such, our results highlight the need  
639 for caution when calculating and interpreting dark diversity estimates, as the conclusions depend  
640 heavily on the methodological decisions made, and methods should thus be tailored to the specific  
641 research questions.

642 Of course, several alternative methods could still be used to estimate dark diversity, and many  
643 adjustments to the methods used above could be proposed. For example, one could use global  
644 datasets such as GBIF to model the climatic niche, rather than data from the study region only. Using  
645 global datasets for such broader-scale niche models could result in a more accurate estimate of the  
646 climatic niche since the entire climatic niche could be modelled, rather than a truncated version as  
647 results from regional data. However, most of these global datasets lack absence data and presences  
648 are obtained using a wide variety of methodologies and spatial resolutions (Tessarolo et al., 2014),  
649 while abiotic data is at the global scale often only available at coarser resolution (Lembrechts et al.,  
650 2019). This could also make the predictions less accurate. Additionally, there is the possibility of  
651 mismatches, especially for rare species, since global datasets can be strongly spatially biased (Meyer  
652 et al., 2016). Therefore, predicting local climatic niches based on global data can make it more difficult  
653 to figure out whether the absences are due to a bias in the global dataset or the drivers under  
654 investigation.

655 The most promising avenue could perhaps come from an approach that combines both climatic niches  
656 with co-occurrences, such as joint Species Distribution Models (jSDMs; Pollock et al., 2014). This recent  
657 class of distribution models draws information from species co-occurrences and explains spatial  
658 variation in species distributions by extending standard species distribution models with species–  
659 species associations. Such an approach could potentially allow distinguishing through one model  
660 between absences driven by environmental unsuitability, biotic interactions, or other drivers.  
661 Nevertheless, Carmona & Pärtel (2020) did find that jSDMs could not outperform the hypergeometric  
662 method, yet they do substantially increase computational time.

#### 663 **4.5 Conclusions**

664 The concept of dark diversity is still in its infancy, yet its contribution to understanding community  
665 completeness and nature conservation has already been shown to be significant (Lewis et al., 2017;  
666 Riibak et al., 2015). In this context, it is crucial to determine whether a species' absence is a result of  
667 species-specific traits or plot characteristics, be it abiotic factors or biotic interactions, which is  
668 something traditional biodiversity studies that only focus on species presences cannot provide. We  
669 here compared different methodological approaches to estimate dark diversity and showed significant  
670 divergence in predicted drivers of dark diversity based on the method used, calling for caution when  
671 interpreting statistical findings on dark diversity estimates. Nevertheless, we can generally conclude  
672 that areas at low elevations, and, to a certain extent, with a low species richness or low levels of  
673 disturbance showed a higher plot-level dark diversity, largely due to natural processes such as  
674 competitive dominance.

#### 675 **Acknowledgments**

676 We thank the master students Renée Lejeune and Jasmine Spreewers for their assistance in gathering  
677 data during the summer of 2021. Additionally, we extend our appreciation to Stef Haesen for supplying  
678 us with the Topographical Wetness Index raster.

679 **Data availability statement**

680 Data will be made available on Zenodo upon acceptance of the paper.

681 **References**

- 682 Alexander, J. M., Lembrechts, J. J., Cavieres, L. A., Daehler, C., Haider, S., Kueffer, C. et al., (2016)  
683 Plant invasions into mountains and alpine ecosystems: current status and future challenges.  
684 *Alpine Botany*, 126, 89–103. <https://doi.org/10.1007/s00035-016-0172-8>
- 685 Auerbach, N. A., Walker, M. D., & Walker, D. A. (1997) Effects of roadside disturbance on substrate  
686 and vegetation properties in arctic tundra. *Ecological Applications*, 7, 218–235.  
687 [https://doi.org/10.1890/1051-0761\(1997\)007\[0218:EORDOS\]2.0.CO;2](https://doi.org/10.1890/1051-0761(1997)007[0218:EORDOS]2.0.CO;2)
- 688 Beals, E. W. (1984) Bray-curtis ordination: An effective strategy for analysis of multivariate ecological  
689 data. *Advances in Ecological Research*, 14, 1–55. <https://doi.org/10.1111/oik.07308>
- 690 Belinchón, R., Hemrová, L., & Münzbergová, Z. (2020) Functional traits determine why species belong  
691 to the dark diversity in a dry grassland fragmented landscape. *Oikos*, 129, 1468–1480.  
692 <https://doi.org/10.1111/oik.07308>
- 693 Bjorkman, A. D., Myers-Smith, I. H., Elmendorf, S. C., Normand, S., Thomas, H. J. D., Alatalo, J. M. et al  
694 (2018) Tundra Trait Team: A database of plant traits spanning the tundra biome. *Global  
695 Ecology and Biogeography*, 27, 1402–1411. <https://doi.org/10.1111/geb.12821>
- 696 Broennimann, O., Di Cola, V., Guisan, A. (2022). *Ecospat: spatial ecology miscellaneous methods.*  
697 *Version 3.4.* Available at <https://CRAN.R-project.org/package=ecospat> [Accessed 16 March  
698 2022]
- 699 Brooks, M. E., Kristensen, K., van Benthem, K. J., Magnusson, A., Berg, C. W., Nielsen, A. et al.  
700 (2017) “glmmTMB Balances Speed and Flexibility Among Packages for Zero-inflated  
701 Generalized Linear Mixed Modeling.” *The R Journal*, 9, 378–400.
- 702 Callaghan, T. V., Jonasson, C., Thierfelder, T., Yang, Z., Hedenås, H., Johansson, M. et al. (2013)  
703 Ecosystem change and stability over multiple decades in the Swedish subarctic: Complex  
704 processes and multiple drivers. *Philosophical Transactions of the Royal Society B: Biological  
705 Sciences*, 368, 1–17. <https://doi.org/10.1098/rstb.2012.0488>
- 706 Callaway, R. M., Brooker, R. W., Choler, P., Kikvidze, Z., Lortie, C. J., Michalet, R. et al. (2002) Positive  
707 interactions among alpine plants increase with stress. *Nature*, 417, 844–848.  
708 <https://doi.org/10.1038/nature00812>
- 709 Carmona, C. P., & Pärtel, M. (2020) Estimating probabilistic site-specific species pools and dark  
710 diversity from co-occurrence data. *Global Ecology and Biogeography*, 30, 316–326.  
711 <https://doi.org/10.1111/geb.13203>
- 712 Chamberlain, S., Barve, V., Mcglinn, D., Oldoni, D., Desmet, P., Geffert, L., & Ram, K. (2021) *rgbif:*  
713 *Interface to the Global Biodiversity Information Facility API. Version 3.6.0.* Available at  
714 <https://CRAN.R-project.org/package=rgbif> [Accessed 15 May 2021]
- 715 Christensen, E., Christensen, B., & Christensen, S. (2021) Problems in using Beals’ index to detect  
716 species trends in incomplete floristic monitoring data (Reply to Bruelheide et al. (2020)).  
717 *Diversity and Distributions*, 27, 1324–1327. <https://doi.org/10.1111/ddi.13276>
- 718 Clavel, J. (2022) Roadside disturbance promotes arbuscular mycorrhizal communities in mountain  
719 regions worldwide [unpublished].
- 720 Clavel, J., Lembrechts, J., Alexander, J., Haider, S., Lenoir, J., Milbau, A. et al. (2021) The role of  
721 arbuscular mycorrhizal fungi in nonnative plant invasion along mountain roads. *New  
722 Phytologist*, 230, 1156–1168. <https://doi.org/10.1111/nph.16954>
- 723 Cribari-Neto, F., Zeileis, A. (2010) Beta Regression in R. *Journal of Statistical Software*, 34, 1–24.



- 724 Crooks, J. A. (2005) Lag times and exotic species: The ecology and management of biological invasions  
725 in slow-motion. *Ecoscience*, 12, 316–329. <https://doi.org/10.2980/i1195-6860-12-3-316.1>
- 726 de Bello, F., Fibich, P., Zelený, D., Kopecký, M., Mudrák, O., Chytrý, M. et al. (2016) Measuring size and  
727 composition of species pools: a comparison of dark diversity estimates. *Ecology and Evolution*,  
728 6, 4088–4101. <https://doi.org/10.1002/ece3.2169>
- 729 Ellenberg, H., Weber, H.E., Düll, R., Wirth, V., Werner, W. & Paulißen, D. (1991) *Zeigerwerte von*  
730 *Pflanzen in Mitteleuropa*. Scripta Geobotanica.
- 731 European Union, Copernicus Land Monitoring Service 2021, European Environment Agency (EEA).
- 732 Ewald, J. (2002) A probabilistic approach to estimating species pools from large compositional  
733 matrices. *Journal of Vegetation Science*, 13, 191–198. [https://doi.org/10.1111/j.1654-](https://doi.org/10.1111/j.1654-1103.2002.tb02039.x)  
734 [1103.2002.tb02039.x](https://doi.org/10.1111/j.1654-1103.2002.tb02039.x)
- 735 Finlay, R. D. (2008) Ecological aspects of mycorrhizal symbiosis: With special emphasis on the  
736 functional diversity of interactions involving the extraradical mycelium. *Journal of*  
737 *Experimental Botany*, 59, 1115–1126. <https://doi.org/10.1093/jxb/ern059>
- 738 Fox, J., & Weisberg, S. (2011). An R companion to applied regression (2nd edition). SAGE Publications  
739 Inc.
- 740 Gijbels, P., Adriaens, D. & Honnay, O. (2012) An orchid colonization credit in restored calcareous  
741 grasslands. *Ecoscience*, 19, 21–28. <https://doi.org/10.2980/19-1-3460>
- 742 Gough, L., Shaver, G. R., Carroll, J., Royer, D. L., & Laundre, J. A. (2000) Vascular plant species richness  
743 in Alaskan arctic tundra: The importance of soil pH. *Journal of Ecology*, 88, 54–66.  
744 <https://doi.org/10.1046/j.1365-2745.2000.00426.x>
- 745 Grieve, I. C. (2000) Effects of human disturbance and cryoturbation on soil iron and organic matter  
746 distributions and on carbon storage at high elevations in the Cairngorm Mountains, Scotland.  
747 *Geoderma*, 95, 1–14. [https://doi.org/10.1016/S0016-7061\(99\)00060-9](https://doi.org/10.1016/S0016-7061(99)00060-9)
- 748 Guisan, A., & Thuiller, W. (2005) Predicting species distribution: Offering more than simple habitat  
749 models. *Ecology Letters*, 8, 993–1009. <https://doi.org/10.1111/j.1461-0248.2005.00792.x>
- 750 Haesen, S., Lembrechts, J. J., De Frenne, P., Lenoir, J., Aalto, J., Ashcroft, M. et al. (2021) ForestTemp  
751 Sub-canopy microclimate temperatures of European forests. *Global Change Biology*, 27, 6307–  
752 6319. <https://doi.org/10.1111/gcb.15892>
- 753 Hartig, F. (2018) *Yes, statistical errors are slowing down scientific progress! Theoretical ecology*.  
754 Available at [https://theoreticalecology.wordpress.com/2018/05/03/yes-statistical-errors-are-](https://theoreticalecology.wordpress.com/2018/05/03/yes-statistical-errors-are-slowing-down-scientific-progress/)  
755 [slowing-down-scientific-progress/](https://theoreticalecology.wordpress.com/2018/05/03/yes-statistical-errors-are-slowing-down-scientific-progress/) [Accessed 2 November 2022]
- 756 Hartig, F. (2022) *DHARMA: Residual diagnostics for hierarchical (multi-level / mixed) regression*  
757 *Models. R package version 0.4.5*. Available at <https://CRAN.R-project.org/package=DHARMA>  
758 [Accessed 14 November 2021]
- 759 Hijmans, R. J., van Etten, J. (2012) *Raster: Geographic data analysis and modeling. R package version*  
760 *3.6-3*. Available at <http://CRAN.R-project.org/package=raster> [Accessed 5 October 2021]
- 761 Hooper, D. U., Adair, E. C., Cardinale, B. J., Byrnes, J. E. K., Hungate, B. A., Matulich, K. L. et al. (2012)  
762 A global synthesis reveals biodiversity loss as a major driver of ecosystem change. *Nature*, 486,  
763 105–108. <https://doi.org/10.1038/nature11118>
- 764 Howe, F., & Smallwood, J. (1982) Ecology of seed dispersal. *Annual Review of Ecology and Systematics*,  
765 13, 201–228. <https://doi.org/10.1146/annurev.es.13.110182.001221>
- 766 Hu, F. S., Higuera, P. E., Duffy, P., Chipman, M. L., Rocha, A. V., Young, A. M. et al. (2015) Arctic tundra  
767 fires: Natural variability and responses to climate change. *Frontiers in Ecology and the*  
768 *Environment*, 13, 369–377. <https://doi.org/10.1890/150063>
- 769 Jonasson, S. (1988) Evaluation of the point intercept method for the estimation of plant biomass.  
770 *Oikos*, 52, 101–106.
- 771 Jones, N. T., & Gilbert, B. (2016) Biotic forcing: the push–pull of plant ranges. *Plant Ecology*, 217, 1331–

- 772 1344. <https://doi.org/10.1007/s11258-016-0603-z>
- 773 Kaarlejärvi, E., & Olofsson, J. (2014) Concurrent biotic interactions influence plant performance at  
774 their altitudinal distribution margins. *Oikos*, 123, 943–952. <https://doi.org/10.1111/oik.01261>
- 775 Karger, D. N., Conrad, O., Böhner, J., Kawohl, T., Kreft, H., Soria-Auza, R. W. et al. (2017) Climatologies  
776 at high resolution for the Earth land surface areas. *Scientific Data*, 4, 170122.  
777 <https://doi.org/10.1038/sdata.2017.122>
- 778 Klanderud, K. (2010) Species recruitment in alpine plant communities: The role of species interactions  
779 and productivity. *Journal of Ecology*, 98, 1128–1133. <https://doi.org/10.1111/j.1365-2745.2010.01703.x>
- 781 Kleyer, M., Bekker, R. M., Knevel, I. C., Bakker, J. P., Thompson, K., Sonnenschein, M. et al. (2008) The  
782 LEDA traitbase: a database of life-history traits of the northwest European flora. *Journal of*  
783 *Ecology*, 96, 1266–1274. <https://doi.org/10.1111/j.1365-2745.2008.01430.x>
- 784 Kopecký, M., Macek, M., & Wild, J. (2021) Science of the Total Environment Topographic Wetness  
785 Index calculation guidelines based on measured soil moisture and plant species composition.  
786 *Science of the Total Environment*, 757, 143785.  
787 <https://doi.org/10.1016/j.scitotenv.2020.143785>
- 788 Körner, C. (2021) *Alpine plant life: Functional plant ecology of high mountain ecosystems*, 3rd edition.  
789 Springer Nature Switzerland AG 2021. <https://doi.org/10.1007/978-3-030-59538-8>
- 790 Kullman, L. (2015) Recent and past trees and climates at the Arctic/Alpine margin in Swedish Lapland:  
791 An Abisko case study Review. *Journal of Biodiversity Management & Forestry*, 4, 1–12.  
792 doi:10.4172/2327-4417.1000150
- 793 Legendre P, Legendre J (1998) *Numerical Ecology*, 3rd edition. Elsevier, Amsterdam.
- 794 Lembrechts, J. J., Lenoir, J., Nuñez, M. A., Pauchard, A., Geron, C., Bussé, G. et al. (2018) Microclimate  
795 variability in alpine ecosystems as stepping stones for non-native plant establishment above  
796 their current elevational limit. *Ecography*, 41, 900–909. <https://doi.org/10.1111/ecog.03263>
- 797 Lembrechts, J. J., Lenoir, J., Roth, N., Hattab, T., Milbau, A., Haider, S. et al (2019) Comparing  
798 temperature data sources for use in species distribution models: From in-situ logging to  
799 remote sensing. *Global Ecology and Biogeography*, 28, 1578–1596.  
800 <https://doi.org/10.1111/geb.12974>
- 801 Lembrechts, J. J., Milbau, A., & Nijs, I. (2014) Alien roadside species more easily invade alpine than  
802 lowland plant communities in a subarctic mountain ecosystem. *PLoS ONE*, 9, 1–10.  
803 <https://doi.org/10.1371/journal.pone.0089664>
- 804 Lembrechts, J. J., Aalto, J., Ashcroft, M. B., De Frenne, P., Kopecký, M., Lenoir, J. et al. (2020) SoilTemp:  
805 A global database of near-surface temperature. *Global Change Biology*, 26, 6616–6629.  
806 <https://doi.org/10.1111/gcb.15123>
- 807 Lembrechts, J. J., van den Hoogen, J., Aalto, J., Ashcroft, M., De Frenne, P., Kempainen, J. et al (2021)  
808 Global maps of soil temperature. *Global Change Biology*, 28, 3110–3144.  
809 <https://doi.org/10.1111/gcb.16060>
- 810 Lenoir, J., Gégout, J. C., Guisan, A., Vittoz, P., Wohlgemuth, T., Zimmermann, N. E. et al. (2010) Cross-  
811 scale analysis of the region effect on vascular plant species diversity in southern and northern  
812 European mountain ranges. *PLoS One*, 5, e15734.  
813 <https://doi.org/10.1371/journal.pone.0015734>
- 814 Lenth, R. (2022) *Emmeans: Estimated marginal means, aka least-squares means. Version 1.8.2.*  
815 Available at: <https://CRAN.R-project.org/package=emmeans> [Accessed 14 November 2021]
- 816 Lewis, R. J., de Bello, F., Bennett, J. A., Fibich, P., Finerty, G. E., Götzenberger, L. et al. (2017) Applying  
817 the dark diversity concept to nature conservation. *Conservation Biology*, 31, 40–47.  
818 <https://doi.org/10.1111/cobi.12723>
- 819 Lewis, R. J., Szava-Kovats, R., & Pärtel, M. (2016) Estimating dark diversity and species pools: An

- 820 empirical assessment of two methods. *Methods in Ecology and Evolution*, 7, 104–113.  
821 <https://doi.org/10.1111/2041-210X.12443>
- 822 Lindén, E., Gough, L., & Olofsson, J. (2021) Large and small herbivores have strong effects on tundra  
823 vegetation in Scandinavia and Alaska. *Ecology and Evolution*, 11, 12141–12152.  
824 <https://doi.org/10.1002/ece3.7977>
- 825 Lüdecke, D., Ben-Shachar, M., Patil, I., Waggoner, P. & Makowski, D. (2021) “performance: An R  
826 package for assessment, comparison and testing of statistical models.” *Journal of Open Source*  
827 *Software*, 6, 3139. <https://doi.org/10.21105/joss.03139>
- 828 MacDougall, A. S., Caplat, P., Olofsson, J., Siewert, M. B., Bonner, C., Esch et al. (2021)  
829 Comparison of the distribution and phenology of Arctic Mountain plants between the early  
830 20th and 21st centuries. *Global Change Biology*, 27, 5070-5083.  
831 <https://doi.org/10.1111/gcb.15767>
- 832 Meyer, C., Weigelt, P., & Kreft, H. (2016) Multidimensional biases, gaps and uncertainties in global  
833 plant occurrence information. *Ecology Letters*, 19, 992–1006.  
834 <https://doi.org/10.1111/ele.12624>
- 835 Mitchell, T. (2014) Developers G. Geospatial Power Tools: GDAL Raster & Vector Commands. *Locate*  
836 *Press*.
- 837 Moeslund, J. E., Brunbjerg, A. K., Clausen, K. K., Dalby, L., Fløjgaard, C., Juel, A., & Lenoir, J. (2017)  
838 Using dark diversity and plant characteristics to guide conservation and restoration. *Journal of*  
839 *Applied Ecology*, 54, 1730–1741. <https://doi.org/10.1111/1365-2664.12867>
- 840 Mohd, M. H., Murray, R., Plank, M. J., & Godsoe, W. (2016). Effects of dispersal and stochasticity on  
841 the presence–absence of multiple species. *Ecological Modelling*, 342, 49-59.  
842 <https://doi.org/10.1016/j.ecolmodel.2016.09.026>
- 843 Mooney, H., Larigauderie, A., Cesario, M., Elmquist, T., Hoegh-Guldberg, O., Lavorel, S. et al. (2009)  
844 Biodiversity, climate change, and ecosystem services. *Current Opinion in Environmental*  
845 *Sustainability*, 1, 46–54. <https://doi.org/10.1016/j.cosust.2009.07.006>
- 846 Mossberg, B. & Stenberg, L. (2008) *Fjällflora: Sverige, Finland, Norge, Svalbard*. Wahlström &  
847 Widstrand.
- 848 Newbold, T., Hudson, L. N., Hill, S. L. L., Contu, S., Lysenko, I., Senior, R. A. et al. (2015) Global effects  
849 of land use on local terrestrial biodiversity. *Nature*, 520, 45–50.  
850 <https://doi.org/10.1038/nature14324>
- 851 Oksanen, J., Blanchet, F.G., Kindt, R. et al. (2022) *Vegan: Community ecology package. Version 2.6-4*.  
852 Available at: <https://CRAN.R-project.org/package=vegan> [Accessed 2 November 2022]
- 853 Olofsson, J. (2001) Influence of herbivory and abiotic factors on the distribution of tall forbs along a  
854 productivity gradient: A transplantation experiment. *Oikos*, 94, 351–357.  
855 <https://doi.org/10.1034/j.1600-0706.2001.940216.x>
- 856 Ozinga, W. A., Hennekens, S. M., Schaminée, J. H. J., Bekker, R. M., Prinzing, A., Bonn, S. et al. (2005)  
857 Assessing the relative importance of dispersal in plant communities using an ecoinformatics  
858 approach. *Folia Geobotanica*, 40, 53–67. <https://doi.org/10.1007/BF02803044>
- 859 Parolo, G., Rossi, G., & Ferrarini, A. (2008). Toward improved species niche modelling: *Arnica montana*  
860 in the Alps as a case study. *Journal of Applied Ecology*, 45, 1410–1418.  
861 <https://doi.org/10.1111/j.1365-2664.2008.01516.x>
- 862 Pärtel, M. (2014) Community ecology of absent species: Hidden and dark diversity. *Journal of*  
863 *Vegetation Science*, 25, 1154–1159. <https://doi.org/10.1111/jvs.12169>
- 864 Pärtel, M., Carmona, C. P., Zobel, M., Moora, M., Riibak, K., & Tamme, R. (2019) DarkDivNet – A global  
865 research collaboration to explore the dark diversity of plant communities. *Journal of*  
866 *Vegetation Science*, 30, 1039–1043. <https://doi.org/10.1111/jvs.12798>
- 867 Pärtel, M., Szava-Kovats, R., & Zobel, M. (2011) Dark diversity: Shedding light on absent species. *Trends*

- 868 *in Ecology and Evolution*, 26, 124–128. <https://doi.org/10.1016/j.tree.2010.12.004>
- 869 Pebesma, E. J., Bivand, R. S. (2005) Classes and methods for spatial data in R. *R news*, 5, 9–13.
- 870 Pellissier, L., Bråthen, K. A., Pottier, J., Randin, C. F., Vittoz, P., Dubuis, A. et al. (2010) Species  
871 distribution models reveal apparent competitive and facilitative effects of a dominant species  
872 on the distribution of tundra plants. *Ecography*, 33, 1004–1014.  
873 <https://doi.org/10.1111/j.1600-0587.2010.06386.x>
- 874 Pollock, L. J., Tingley, R., Morris, W. K., Golding, N., O'Hara, R. B., Parris, K. M. et al. (2014)  
875 Understanding co-occurrence by modelling species simultaneously with a Joint Species  
876 Distribution Model (JSDM). *Methods in Ecology and Evolution*, 5, 397–406.  
877 <https://doi.org/10.1111/2041-210X.12180>
- 878 Prieur-Richard, A. H., & Lavorel, S. (2000) Invasions: The perspective of diverse plant communities. (  
879 *Austral Ecology*, 25, 1–7. <https://doi.org/10.1046/j.1442-9993.2000.01033.x>
- 880 QGIS.org, 2021. QGIS Geographic Information System. QGIS Association. Available at:  
881 <http://www.qgis.org>
- 882 Quinn, Q. P., Keough, M. J. (2002) *Experimental design and data analysis for biologists*. Cambridge  
883 University Press, Cambridge. <https://doi.org/10.1017/CBO9780511806384>
- 884 R Core Team (2021) R: A language and environment for statistical computing. R Foundation for  
885 Statistical Computing, Vienna, Austria. Available at: <https://www.R-project.org/>
- 886 Rashid, I., Haq, S. M., Lembrechts, J. J., Khuroo, A. A., Pauchard, A., & Dukes, J. S. (2021) Railways  
887 redistribute plant species in mountain landscapes. *Journal of Applied Ecology*, 58, 1967–1980.  
888 <https://doi.org/10.1111/1365-2664.13961>
- 889 Riibak, K., Reitalu, T., Tamme, R., Helm, A., Gerhold, P., Znamenskiy, S. et al. (2015) Dark diversity in  
890 dry calcareous grasslands is determined by dispersal ability and stress-tolerance. *Ecography*,  
891 38, 713–721. <https://doi.org/10.1111/ecog.01312>
- 892 Sonesson, M., & Lundberg, B. (1974) Late Quaternary forest development of the Tornetrask area,  
893 North Sweden. *Oikos*, 25, 121–133. <https://doi.org/10.2307/3543947>
- 894 Soudzilovskaia, N. A., Vaessen, S., Barcelo, M., He, J., Rahimlou, S., Abarenkov, K. et al. (2020)  
895 FungalRoot: global online database of plant mycorrhizal associations. *New Phytologist*, 227,  
896 955–966. <https://doi.org/10.1111/nph.16569>
- 897 Stephenson, I. (2016) *What is Dark Diversity?* Methods blog. Available at  
898 <https://methodsblog.com/2016/05/22/dark-diversity/> [Accessed 4 April 2022]
- 899 Sugihara, N. G., Van Wagtenonk, J. W., & Fites-Kaufman, J. (2006) Fire as an ecological process. In:  
900 Van Wagtenonk, J. W., Sugihara, N. G., Stephens, S. L., Thode, A. E., Shaffer, K. E., & Fites-  
901 Kaufman, J. A. (Eds), *Fire in California's ecosystems*, 1st edition. University of California Press,  
902 pp. 58-74.
- 903 Tendersoo, L. (Ed) (2017) *Biogeography of Mycorrhizal Symbiosis*, 1st edition. Springer International  
904 Publishing 2017. <https://doi.org/10.1007/978-3-319-56363-3>
- 905 Tessarolo, G., Rangel, T. F., Araújo, M. B., & Hortal, J. (2014) Uncertainty associated with survey design  
906 in Species Distribution Models. *Diversity and Distributions*, 20, 1258–1269.  
907 <https://doi.org/10.1111/ddi.12236>
- 908 Tilman, D., Isbell, F., & Cowles, J. M. (2014) Biodiversity and ecosystem functioning. *Annual Review of*  
909 *Ecology, Evolution, and Systematics*, 45, 471–493. <https://doi.org/10.1146/annurev-ecolsys-120213-091917>
- 910 Tybirk, K., Nilsson, M. C., Michelsen, A., Kristensen, H. L., Sheytsova, A., Strandberg, M. T. et al. (2000)  
911 Nordic *Empetrum* dominated ecosystems: Function and susceptibility to environmental  
912 changes. *Ambio*, 29, 90–97. <https://doi.org/10.1579/0044-7447-29.2.90>
- 913 Vonlanthen, C. M., Kammer, P. M., Eugster, W., Bühler, A., & Veit, H. (2006) Alpine vascular plant  
914

- 915 species richness: The importance of daily maximum temperature and pH. *Plant Ecology*, 184,  
916 13–25. <https://doi.org/10.1007/s11258-005-9048-5>
- 917 Wedegärtner, R. E., Lembrechts, J. J., van der Wal, R., Barros, A., Chauvin, A., Janssens et al. (2022)  
918 Hiking trails shift plant species' realized climatic niches and locally increase species richness.  
919 *Diversity and Distributions*, 28, 1416-1429 <https://doi.org/10.1111/ddi.13552>
- 920 Westoby, M. (1998) A leaf-height-seed ( LHS ) plant ecology strategy scheme. *Plant and Soil*, 199, 213–  
921 227. <https://doi.org/10.1023/A:1004327224729>
